1 **Title:**

2 **Restriction of *Wolbachia* bacteria in early embryogenesis of**  
3 **neotropical *Drosophila* species via ER-mediated autophagy**

4

5 **Running title:** Infection tropism in *Drosophila*

6

7 **Authors:** Anton Strunov <sup>1\*</sup>, Katy Schmidt <sup>1</sup>, Martin Kapun <sup>1,2</sup>, Wolfgang J. Miller <sup>1\*</sup>

8

9 **Author affiliations:** <sup>1</sup> Center for Anatomy and Cell Biology, Department of Cell and  
10 Developmental Biology, Medical University of Vienna, Austria; <sup>2</sup> Department of Evolutionary  
11 Biology and Environmental Studies, University of Zurich, Switzerland

12

13 \* corresponding authors

14 **Emails:**

15 anton.strunov@meduniwien.ac.at

16 katy.schmidt@meduniwien.ac.at

17 martin.kapun@meduniwien.ac.at

18 wolfgang.miller@meduniwien.ac.at

19

20

21 **Keywords:** Symbiosis, *Drosophila*, *Wolbachia*, tropism, autophagy, development, germline

22

23

24 **Abstract**

25 *Wolbachia* bacteria are maternally transmitted intracellular microbes that are not only restricted  
26 to the reproductive organs but also found in various somatic tissues of their native hosts. The  
27 abundance of the endosymbiont in somatic tissues, usually a dead end for vertically transmitted  
28 bacteria, causes a multitude of effects on life history traits of their hosts, which are still not well  
29 understood. Thus, deciphering the host-symbiont interactions on a cellular level throughout a  
30 host's lifecycle is of great importance to understand their homeostatic nature, persistence and  
31 spreading success. Using fluorescent and transmission electron microscopy, we conducted a  
32 comprehensive analysis of *Wolbachia* tropism in somatic and reproductive tissues of six  
33 *Drosophila* species at the intracellular level during host development. Our data uncovered  
34 diagnostic patterns of infections to embryonic primordial germ cells and to particular cells of  
35 somatic tissues in three different neotropical *Drosophila* species of the willistoni and saltans  
36 groups that have apparently evolved in both independently. We further found that restricted  
37 patterns of *Wolbachia* tropism are already determined in early fly embryogenesis. This is achieved  
38 via selective autophagy, and the restriction of infection is preserved through larval hatching and  
39 metamorphosis. We further uncovered tight interactions of *Wolbachia* with membranes of the  
40 endoplasmic reticulum, which might play a scaffolding role for autophagosome formation and  
41 subsequent elimination of the endosymbiont. Finally, by analyzing *D. simulans* lines transinfected  
42 with non-native *Wolbachia*, we uncovered that the host genetic background regulates tissue  
43 tropism of infection. Our data demonstrate a peculiar and novel mechanism to limit and spatially  
44 restrict bacterial infection in somatic tissues during a very early stage of host development.

45

46

## 47 **Introduction**

48 *Wolbachia* are endosymbiotic bacteria residing within cells of many arthropod and some  
49 nematode species (reviewed in Kaur et al., 2021). Most of these host-microbe associations are  
50 considered facultative and even pathogenic (Min and Benzer, 1997), although cases of obligate  
51 mutualism also exist (Dedeine et al., 2003; Taylor et al., 2005; Hosokawa et al., 2010; Miller et al.,  
52 2010; Schneider et al., 2019). In insects, high trans-generational infectivity and maintenance of  
53 *Wolbachia* is ensured by its successful transovarial transmission (reviewed in Werren et al., 2008;  
54 Landmann, 2019), albeit cases of horizontal transmission also exist (reviewed in Pietri et al., 2016;  
55 Chrostek et al., 2017). Thus, the microbe mostly relies on colonization of the female germline to  
56 be stably transmitted to the next generation (Serbus et al., 2008; Kaur et al., 2021). However, the  
57 infection is not solely confined to reproductive organs and can be found in different somatic tissues  
58 like the central nervous system (CNS), retina, fat body, muscles, hemolymph and Malpighian  
59 tubules of a host (reviewed in Pietri et al., 2016). Such a variety of bacterial localization brings  
60 about a wide range of effects on host fitness and behavior (reviewed in Zug and Hammerstein,  
61 2015). Moreover, regulation of *Wolbachia* density within somatic tissues is a key factor in host-  
62 symbiont association, strongly affecting both host survival and persistence of bacteria in a  
63 population (Min and Benzer 1997; Chrostek et al., 2013; Martinez et al., 2014; López-Madrigal  
64 and Duarte, 2019). The rich somatic life of the bacteria provides a scarcely studied repertoire of  
65 intimate cell-specific interactions balancing host-microbe association. Understanding its essence  
66 is of great importance for fundamental knowledge as well as for application in biological control  
67 of invertebrate pests and vectors of diseases (reviewed in Ross et al., 2019).

68 The neotropical *Drosophila* species *D. paulistorum*, *D. willistoni* and *D. tropicalis* (willistoni  
69 group) as well as *D. septentrionalis* and *D. sturtevantii* (saltans group) represent unique models  
70 for studying host-microbe interactions due to their long-term history of co-evolution with  
71 *Wolbachia* endosymbionts (Miller and Riegler, 2006; Miller et al., 2010). Each of these neotropical

72 *Drosophila* species carries a specific *Wolbachia* strain, which exhibits either obligate mutualistic  
73 (*D. paulistorum*) or facultative (all other four host species) relationships. Among these neotropical  
74 *Wolbachia* strains, *wPau*, *wWil*, *wTro* and *wSpt* from *D. paulistorum*, *D. willistoni*, *D. tropicalis* and  
75 *D. septentrionalis* are closely related to each other, whereas *wStv* from *D. sturtevantii* is the  
76 most distantly related to the rest (Miller and Riegler, 2006; Martinez et al., 2014). In embryos of  
77 *D. willistoni* (Miller and Riegler, 2006) and *D. paulistorum* (Miller et al., 2010) native *Wolbachia*  
78 are mainly restricted to the primordial germ cells (PGCs), the future germline, whereas palearctic  
79 fly hosts like *D. melanogaster* and *D. simulans* embryos show systemic infections with no defined  
80 tropism (Miller and Riegler, 2006).

81 We have furthermore recently uncovered the spatial and asymmetric restriction of  
82 *Wolbachia* in *D. paulistorum* to defined larval and adult brain regions (Strunov et al., 2017), which  
83 might be linked to the symbiont-directed assortative mating behavior observed in this obligate  
84 host-microbe association (Miller et al., 2010; Schneider et al., 2019). However, it remains unclear  
85 (i) if the PGC and neural restrictions are unique to *D. paulistorum* hosts, (ii) at which  
86 developmental stages the tropism is established and (iii) by which cellular mechanism(s) the  
87 germline and somatic *Wolbachia* restrictions are achieved. Such diverse types of host-microbe  
88 interactions provide an opportunity to decipher the mechanistic basis for their tropism to defined  
89 somatic and germline tissues as well as their density within a cell.

90 By using fluorescent *in situ* hybridization (FISH) with *Wolbachia*-specific probes  
91 throughout host development we uncovered spatial and temporal dynamics of both the “systemic”  
92 and “restricted” infection types in six native *Drosophila* hosts. With the help of sequential  
93 *Wolbachia*-FISH and immunofluorescence we showed that the distribution of infection is  
94 determined already during early embryogenesis with elimination of *Wolbachia* from most of the  
95 embryonic cells, but not PGCs, through autophagy. This leads to a restriction of infection to the  
96 future gonads and a few particular areas of somatic tissues in the adult. With the help of  
97 transmission electron microscopy, we mapped out the early stages of the bacterial elimination

98 process and could demonstrate that the endoplasmic reticulum tightly encircling *Wolbachia* in  
99 early-cellularized blastodermal embryos might serve as a scaffold for assembly of the autophagy  
100 machinery. Finally, by transferring a natively restricted *Wolbachia* strain into a systemic  
101 background, we decipher that the host background plays a major role in regulating the infection  
102 tropism in tissues.

103

## 104 **Results**

### 105 ***Wolbachia* infection is restricted to specific areas of somatic and reproductive tissues of** 106 **some neotropical *Drosophila* species.**

107

108 In a recent publication, we have shown that, contrary to the systemic infections in *D. melanogaster*  
109 and *D. simulans* (Albertson et al., 2013), *Wolbachia* of neotropical *D. paulistorum* flies are tightly  
110 restricted to certain brain areas (Strunov et al., 2017). In the present study we investigated  
111 whether such an explicit isolation of infection in the nervous tissue is an exceptional case for *D.*  
112 *paulistorum* flies or similar examples of bacterial restriction could be found in other related species.  
113 We analyzed the distribution of native *Wolbachia* in both somatic and reproductive tissues of five  
114 neotropical *Drosophila* species (*D. paulistorum*, *D. willistoni*, *D. tropicalis*, *D. septentrionalis*, *D.*  
115 *sturtevantii*) and *D. melanogaster* as a representative for the systemic infection (Strunov et al.,  
116 2017). Finally, we tested bacterial tropism in a *de novo* host-symbiont association by transfecting  
117 the systemic host *D. simulans* (STC) with the *Wolbachia* strain *wWil* from *D. willistoni*, a  
118 representative of the restriction type, we thereon named *wWil*/STC (**Table 1**). For the sake of  
119 simplicity in the following text, we use SIT and RIT abbreviations to define systemic infection type  
120 and restricted infection type, respectively.

121

122

123

124 **Table 1. *Drosophila* species and lines used in the study.**

125

| <i>Drosophila</i> species          | subgroup     | line code   | short name | <i>Wolbachia</i> strain |
|------------------------------------|--------------|-------------|------------|-------------------------|
| <i>D. melanogaster</i>             | melanogaster | Harwich H2  | MEL        | wMel                    |
| <i>D. simulans</i>                 | melanogaster | KB30STC     | STC        | wAu                     |
| <i>D. tropicalis</i>               | willistoni   | Trop1       | TRO        | wTro                    |
| <i>D. paulistorum</i>              | willistoni   | Pau5 O11    | PAU        | wPau                    |
| <i>D. willistoni</i>               | willistoni   | JS6.3       | WIL        | wWil                    |
| <i>D. septentrionalis</i>          | saltans      | SEP1/PLR    | SPT        | wSpt                    |
| <i>D. sturtevantii</i>             | sturtevantii | FG707       | STV        | wStv                    |
| <i>D. simulans</i> TI <sup>§</sup> | melanogaster | wilE/STC 36 | wilE/STC   | wWil                    |

126  
127 <sup>§</sup> transfected by microinjection

128  
129  
130  
131 *Tropism of Wolbachia in adult and larval nervous tissues of Drosophila*

132  
133 We conducted fluorescent *in situ* hybridization (FISH) analysis using *Wolbachia*-specific 16S  
134 rRNA probes to study the bacterial distribution in adult brains of all six species listed above. As  
135 shown in **Figure 1A-C**, *D. septentrionalis* (SPT) and *D. tropicalis* (TRO) exhibit, similar to *D.*  
136 *melanogaster* (MEL), a SIT pattern with bacteria evenly distributed all over the tissue without  
137 accumulation in certain brain regions. In contrast, *Wolbachia* of *D. paulistorum* (PAU), *D. willistoni*  
138 (WIL) and *D. sturtevantii* (STV) were found to be locally restricted (**Figure 1D-F**). Although we did  
139 not focus on deciphering the identity of infected brain regions in the present study, all three  
140 species exhibited clear isolation of infection in certain regions of the brain, whereas most of the  
141 tissue was free of *Wolbachia*. For measuring *Wolbachia* tropism in respective brains, we  
142 determined the restriction indices (RI) as a number of uninfected cells divided by total number of  
143 cells (see Materials and Methods section). The indices revealed two significantly distinct groups  
144 of either systemic (MEL, SPT, TRO hosts) or restricted (PAU, WIL, STV hosts) infections (**Figure**  
145 **1M**) with RI ranging from 0.02 to 0.12 and 0.82 to 0.88, respectively (Poisson regression:  $p < 0.001$ ).

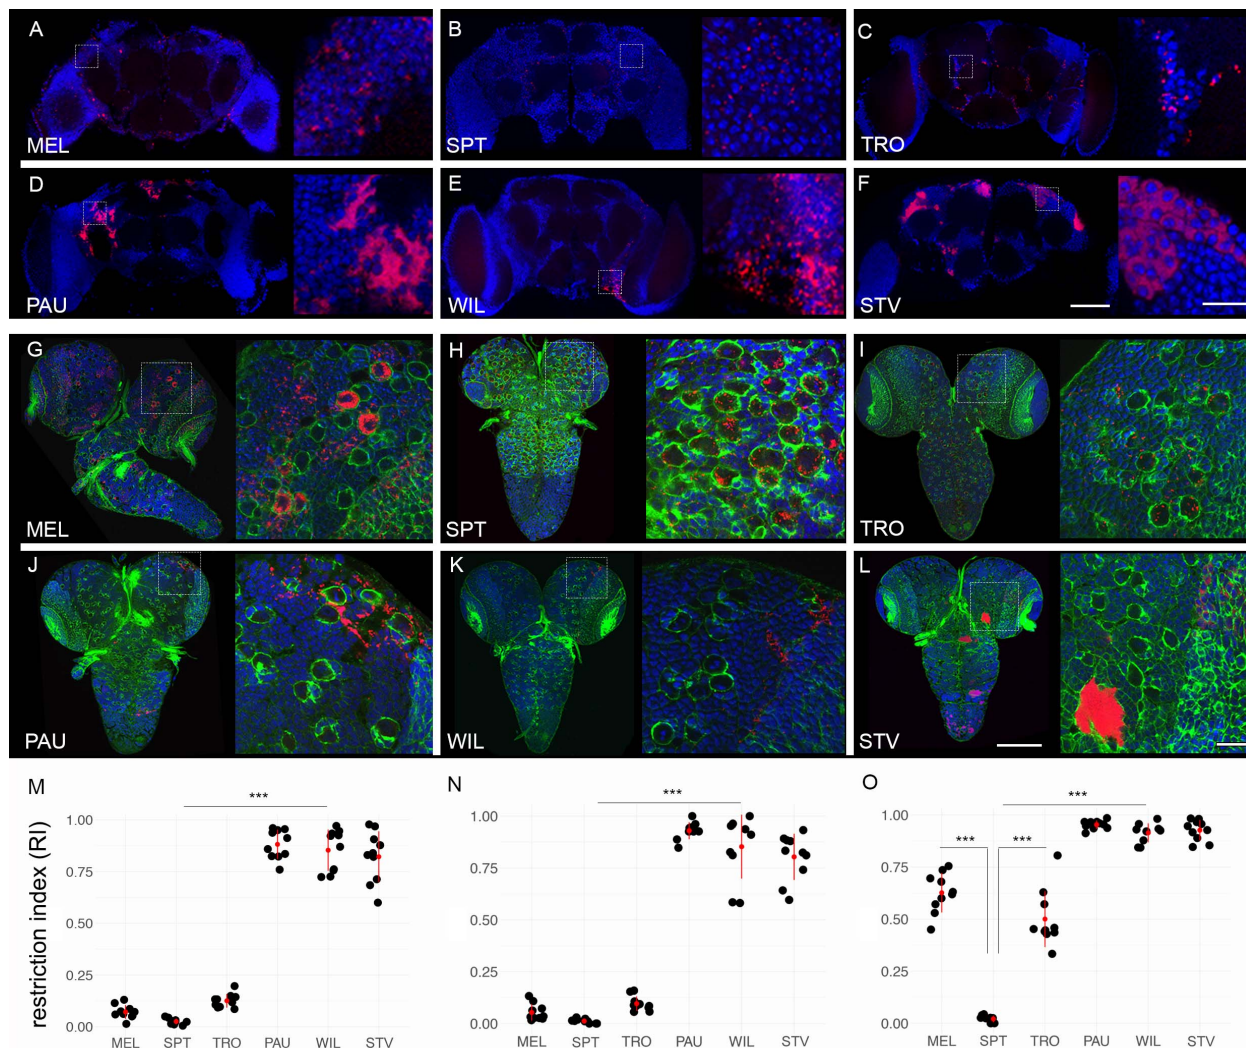

146

147 **Figure 1. Restriction of *Wolbachia* infection in nervous tissues of neotropical *Drosophila*.**  
 148 Fluorescent *in situ* hybridization on different *Drosophila* adult brains (A-F) and 3<sup>rd</sup> instar larval  
 149 CNS (G-L) using 16S rRNA *Wolbachia*-specific probe (red). The bottom plots show restriction  
 150 indices of all six species for *Wolbachia* infections in adult brains (N) and larval CNS (M),  
 151 respectively. O shows RI of bacterial infection in neuroblasts of 3<sup>rd</sup> instar larval CNS. DNA is  
 152 stained with DAPI (blue) and actin with Phalloidin (green). For each *Drosophila* species 10 organs  
 153 from each developmental stage were analyzed (Supplemental data file). Asterisks denote  
 154 statistical significance (\*\*\*,  $p < 0.001$ ; Poisson regression). Red bars show standard deviation, red  
 155 dots designate the mean value. Scale bar: 50 μm.

156

157 Next, we examined the distribution of *Wolbachia* in the central nervous system (CNS) of  
 158 3<sup>rd</sup> instar larvae. The analysis of bacterial infection in larvae of all six species (Figure 1G-L) using  
 159 same FISH approach demonstrated similar results as obtained for the adult brains. The larval  
 160 nervous tissue from MEL, SPT and TRO showed systemic infection (Figure 1G-I), whereas

161 *Wolbachia* in PAU, WIL and STV were locally restricted (**Figure 1J-L**). Evaluation of the RI for  
162 *Wolbachia* infection revealed a limited restriction of bacteria in SIT species in which the index  
163 ranged from 0.01 to 0.09. Conversely, the high indices in RIT species ranged from 0.80 to 0.92  
164 (**Figure 1N**; Poisson regression:  $p < 0.001$ ). Hence, the pattern of bacterial localization is already  
165 determined in the larvae and preserved through metamorphosis.

166 The nervous system of 3<sup>rd</sup> instar larvae consists of three different cell types, i.e.,  
167 neuroblasts (neural stem cells), neurons and glial cells (Homem and Knoblich, 2012). We  
168 therefore asked whether the endosymbiont targets any of these cell types specifically or acts  
169 regardless of the lineage in a locally restricted manner. Using a neuroblast-specific antibody  
170 against Deadpan, a transcriptional repressor responsible for maintenance of neuroblast's self-  
171 renewing, and also a glia-specific antibody against Repo, a transcriptional factor expressed in  
172 glial cells, we analyzed the cell type specificity of *Wolbachia* localization in the CNS of larvae of  
173 all six lines (**Figure S1**).

174 We found infections of glial cells located in the cortex of the CNS in all six analyzed species.  
175 MEL, SPT and TRO showed systemic patterns, whereas bacteria in PAU, WIL and STV were  
176 locally restricted (**Figure S2**). The majority of bacteria, however, were concentrated in neuroblasts  
177 and neurons of the larval CNS. Neuroblasts, which we differentiated from other cell types by their  
178 bigger size of approximately 10  $\mu\text{m}$  in diameter (see the insets of **Figure 1G-L**), showed distinctive  
179 *Wolbachia* infection patterns depending on the species analyzed (**Figure S3A**). Bacterial  
180 densities in a single neuroblast were quantified by dividing the bacterial load within the cell to the  
181 area of the cell's cytoplasm (**Figure S3A**). The highest accumulation of bacteria in neural stem  
182 cells was observed in MEL and STV with both densities equating to 0.76. In contrast, TRO and  
183 SPT exhibited the lowest densities of 0.13 and 0.30, respectively. Unlike these species, the  
184 densities in neuroblasts of PAU and WIL showed an unusually high variance within individual  
185 larval CNS, ranging from either 0.2 to 0.79 (mean = 0.51) or 0.1 to 0.79 (mean = 0.57), respectively.  
186 High variance in these two restricting hosts might suggest that their respective *Wolbachia* strains



187 only target a specific, yet undetermined subset of neuroblasts. Quantification of RI of bacteria in  
188 neuroblasts of all six semispecies (**Figure 1O**) revealed that despite the SIT patterns in MEL and  
189 TRO, approximately only half of their neural stem cells were infected with *Wolbachia*, whereas in  
190 SPT almost all neuroblasts were *Wolbachia*-positive (0.63, 0.51 and 0.02; Poisson regression:  
191  $p < 0.001$ ). On the other hand, in all hosts with RIT patterns (PAU, WIL and STV) the RIs were  
192 significantly higher than in the systemic ones (0.95, 0.93 and 0.92; Poisson regression:  $p < 0.001$ ).

193 By using a specific antibody against Asense, a transcriptional factor expressed in type I  
194 but not type II neuroblasts, we further specified the cell type of infection (**Figure S4**). Type II  
195 neuroblasts divide symmetrically producing intermediate neural progenitors, which then divide  
196 asymmetrically to self-renew and generate a ganglion mother cell whereas type I neuroblasts  
197 divide asymmetrically and only once (Homem and Knoblich, 2012). As a result, type II neuroblasts  
198 generate a greater number of cells in the adult brain than type I. We hypothesized that infecting  
199 type II neuronal stem cells might be an opportunity for *Wolbachia* to achieve a broader spread. In  
200 all three species with SIT pattern, *Wolbachia* were found in both neuroblast types (**Figure S4**, first  
201 3 rows). For hosts with RIT patterns, however, only type I neuroblasts were found infected with  
202 the endosymbiont (**Figure S4**, last 3 rows).

203 Furthermore, to analyze the aggregation of *Wolbachia* infection in the CNS, i.e., the  
204 formation of clusters of neighboring neurons bearing infections, we quantified the average number  
205 of infected neurons in groups (**Figure S3B**). Quantifications demonstrated the formation of big  
206 clusters of infected neurons in SPT, MEL and STV (21.1, 18.5 and 15.9 neurons on average per  
207 cluster, respectively) and smaller clusters in WIL, TRO and PAU (13.5, 9.5 and 7.2 neurons on  
208 average per cluster, respectively), without statistically significant differences between systemic  
209 and restring hosts ( $p > 0.05$ ).

210 In summary, we observe two distinct patterns of *Wolbachia* tropism in *Drosophila* nervous  
211 tissues, the systemic in MEL, SPT and TRO with an overall distribution of infection and the  
212 restricted in PAU, WIL and STV with isolation of infection to certain areas of the tissue. The pattern

213 of infection is already determined in 3<sup>rd</sup> instar larvae and preserved through metamorphosis with  
214 no tropism to a specific type of nerve cell, but detectable at higher densities in neuroblasts, the  
215 neural stem cells. In order to screen more saltans group representatives, *Wolbachia* FISH in  
216 neuronal tissues of *D. prosaltans* (saltans subgroup) and *D. lehrmanae* (sturtevantii subgroup)  
217 exhibited, similarly to SPT and STV hosts, either systemic or restricted patterns, respectively  
218 (**Figure S5**). Interestingly, bacterial densities within neural stem cells as well as their ability to  
219 aggregate vary among different *Drosophila* hosts irrespective to their diagnostic SIT and RIT  
220 patterns.

221

#### 222 *Tropism of Wolbachia in Drosophila ovaries*

223

224 For transovarial transmission, *Wolbachia* endosymbionts need to colonize the female germline.  
225 *Drosophila* ovaries consist of reproductive and somatic tissues. The nurse cells and the oocytes,  
226 originating from the germline stem cells, form the reproductive part. Conversely, the follicle cells,  
227 which ensheath the former, are derived from the somatic stem cell niche and represent the  
228 somatic part (Kirilly and Xie, 2007). Our systematic analysis of bacterial infections using FISH in  
229 the adult ovaries at stage 3-5 of all six species revealed that the majority of bacteria are associated  
230 with the reproductive part. However, they are also found in the soma but generally at lower levels  
231 (**Figure 2A-F**).

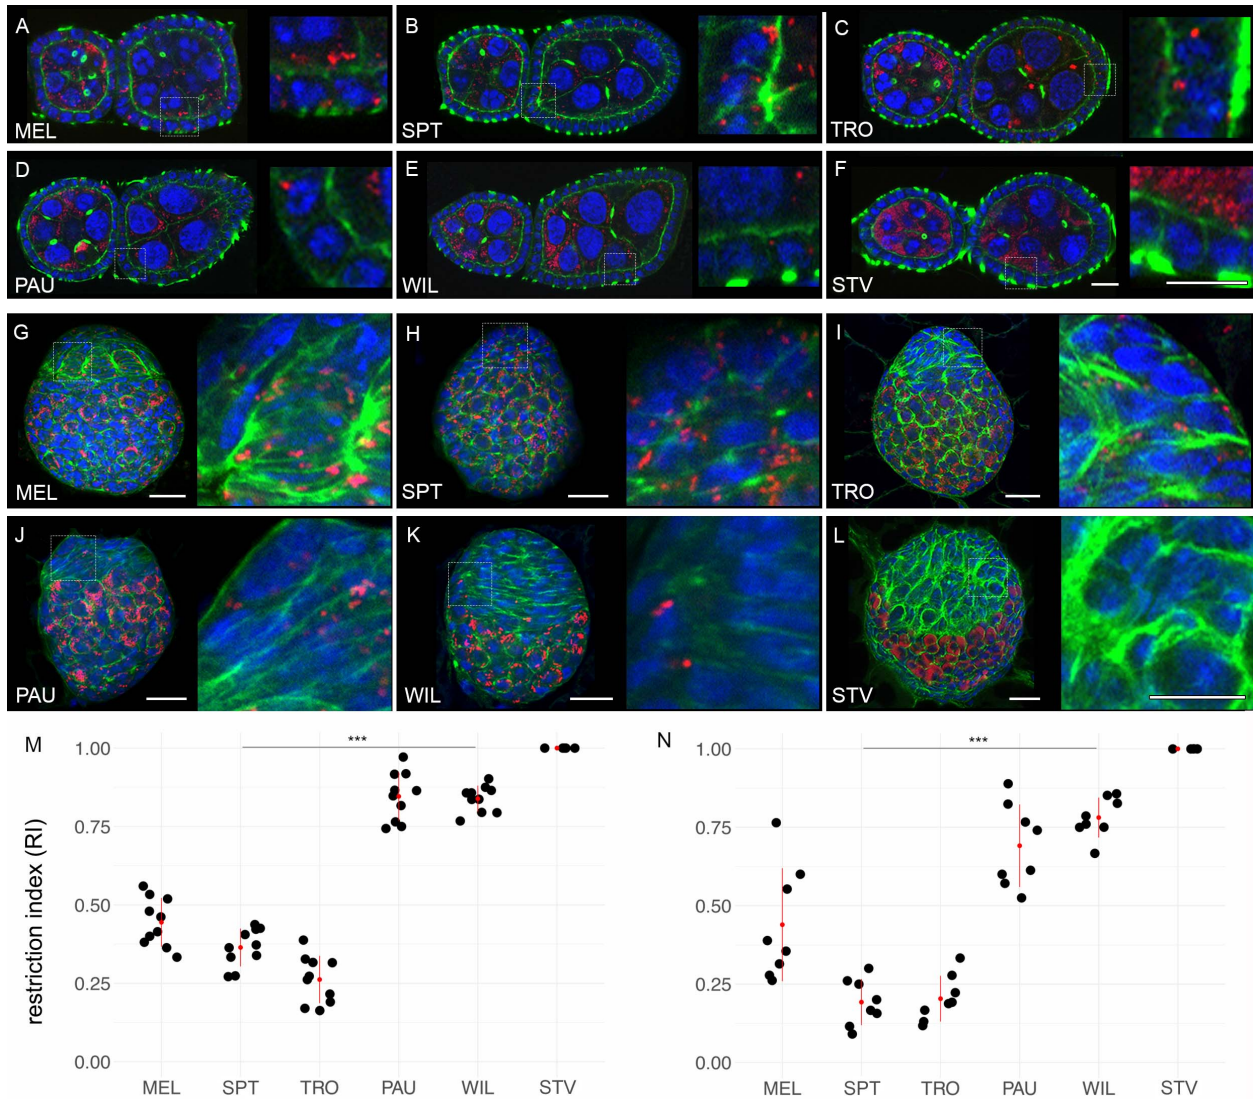

232

233 **Figure 2. Restriction of *Wolbachia* infection in somatic and reproductive parts of adult and**  
234 **larval ovaries of neotropical *Drosophila*.** Fluorescent *in situ* hybridization of different  
235 *Drosophila* adult ovaries (A-F) and 3<sup>rd</sup> instar larval ovaries (G-L) using 16S rRNA *Wolbachia*-  
236 specific probe (red). RIs of *Wolbachia* infection in follicle cells of adult (M) and larval (N) ovaries  
237 for all six species. DNA is stained with DAPI (blue), actin with Phalloidin (green). Asterisks denote  
238 statistical significance (\*\*\*,  $p < 0.001$ ; Poisson regression). Red bars show standard deviation, red  
239 dots designate the mean value. In total, 8-10 organs were analyzed for every species  
240 (Supplemental data file). Scale bar: 20  $\mu\text{m}$ .

241

242 Infection density in the nurse cells and the oocyte of PAU, WIL and STV was significantly  
243 higher than in MEL, SPT and TRO (Figure S6; Poisson regression:  $p < 0.001$ ). We also observed  
244 *Wolbachia* infection in the somatic part of the ovaries. Respective RIs in follicle cells varied among

245 the species with relatively low average values in the systemic hosts TRO, SPT and MEL (**Figure**  
246 **2M**; 0.26, 0.36 and 0.44, respectively), but significantly higher in the restrictors WIL, PAU and  
247 STV (0.84, 0.85 and 1, respectively; Poisson regression:  $p < 0.001$ ).

248 The analysis of bacterial infection using FISH in 3<sup>rd</sup> instar larval ovaries revealed similar  
249 results as observed in the adult ovaries (**Figure 2G-L**). The larval ovary can also be divided into  
250 somatic and reproductive parts either morphologically or by specific staining. Similar to adult  
251 ovaries, *Wolbachia* is dominating in the reproductive part (germ cells) of all six species analyzed.  
252 In the somatic part, low restriction of infection was observed only in systemic hosts SPT, TRO and  
253 MEL (**Figure 2N**; 0.19, 0.20 and 0.44, respectively), in contrast to significantly higher restriction  
254 in WIL and PAU (0.78 and 0.70, respectively; Poisson regression:  $p < 0.001$ ) and absence of  
255 infection in STV. The preservation of infection patterns in the somatic part of the adult ovary in  
256 comparison to the larval gonad is in accordance with the same trend described for the larval CNS  
257 and adult brain where the bacterial distribution was also preserved after metamorphosis.

258  
259 ***Wolbachia* densities drop dramatically during early embryonic gastrulation in *Drosophila***  
260 **species with restricting pattern of infection.**

261  
262 Data obtained from the adult and 3<sup>rd</sup> instar larval somatic and reproductive tissues demonstrate  
263 that cell type-specific tropisms of *Wolbachia* are determined already in larvae and are preserved  
264 during the metamorphosis of the host. To investigate how infection patterns form initially, we  
265 analyzed *Wolbachia* distribution through different *Drosophila* embryogenesis stages. Analysis of  
266 *Wolbachia* localization in early embryos (stage 3-5) revealed SIT patterns with no differences in  
267 infection distribution in any of the six tested hosts (**Figure 3**, left row). Bacteria were evenly  
268 dispersed all over the embryo and closely associated with the chromatin during mitosis.  
269 Interestingly, in mid-embryogenesis (stage 6-9), *Wolbachia* densities decreased in PAU, WIL and  
270 STV but not in MEL, SPT and TRO embryos (**Figure 3A**, middle row). Although bacteria were still

271 evenly distributed across all embryonic areas in all six species at early gastrulation, many cells of  
272 PAU, WIL and STV embryo were already cleared of infection. Finally, at late embryogenesis (stage  
273 13-15) we observed drastic differences in *Wolbachia* distribution between species with SIT and  
274 RIT patterns of bacterial infection (**Figure 3**, right row). While in systemic MEL, SPT and TRO  
275 hosts bacteria were equally dispersed in most embryonic tissues, *Wolbachia* in PAU, WIL and  
276 STV species were now locally restricted to the primordial germ cells (PGCs), the future gonads,  
277 and to some additional isolated somatic cell clusters in the embryo.

278 Quantification of global *Wolbachia* densities in embryos at these three defined  
279 developmental stages using Fiji confirmed this dramatic reduction of infection starting at mid-  
280 embryogenesis in PAU, WIL and STV ( $p < 0.001$ , One-way ANOVA with Tukey HSD test), whereas  
281 densities of bacteria in MEL, TRO and SPT hosts remained unchanged across all stages (**Figure**  
282 **3B**).

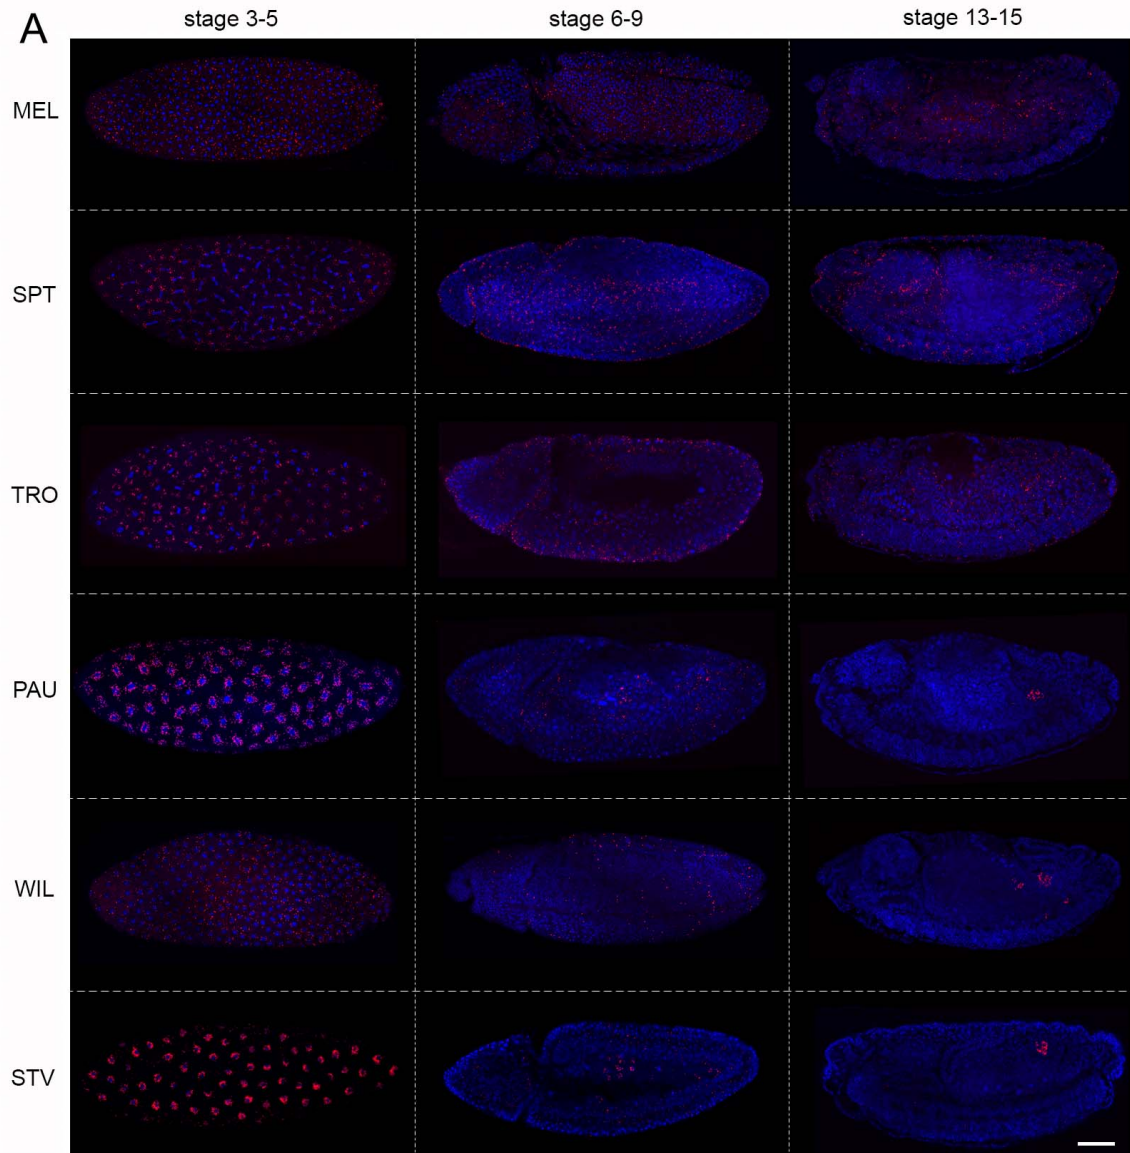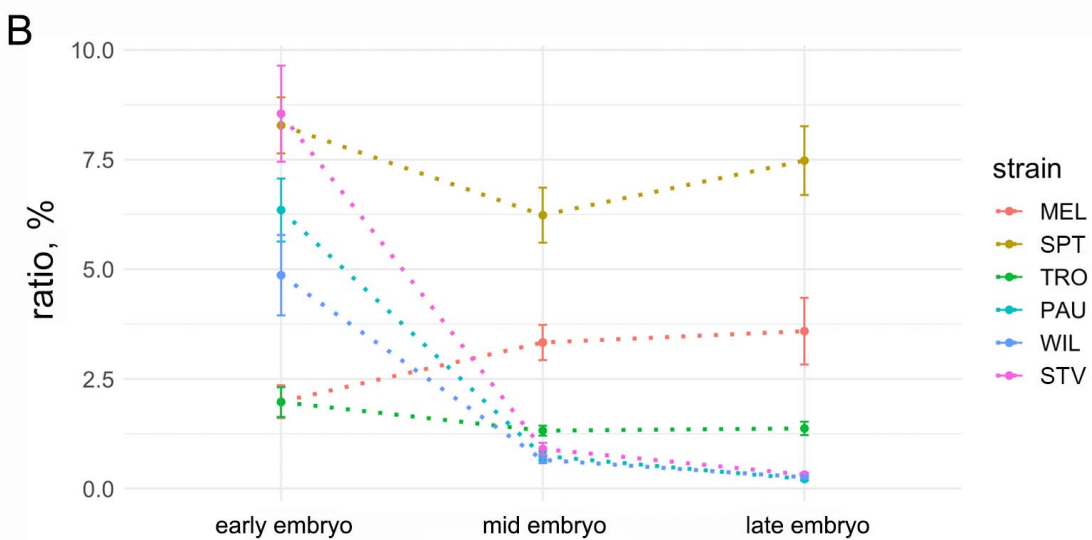

284 Figure 3. **Dramatic reduction of *Wolbachia* density during mid-embryogenesis in**  
285 **neotropical *Drosophila* species.** (A) Fluorescent *in situ* hybridization of *Drosophila* embryos at  
286 stage 3-5, 6-9 and 13-15 of embryogenesis, using 16S rRNA *Wolbachia*-specific probe (red). DNA  
287 is stained with DAPI (blue). (B) Quantification of *Wolbachia* density at early, mid and late  
288 embryogenesis, using Fiji, as bacterial density in a whole embryo divided by the area of an embryo.  
289 Bars show standard error of the mean. For each species and stage 5 embryos were analyzed for  
290 density measurements (Supplemental data file). Scale bar: 50  $\mu\text{m}$ .  
291

292 To verify our assumption that *Wolbachia* are selectively maintained mainly in PGCs of late  
293 WIL, PAU and STV embryos, we performed a sequential FISH and immunofluorescence analysis  
294 using an antibody against Vasa, a protein essential for the pole plasm assembly in the egg, which  
295 is commonly used as a germline precursor marker (Gustafson and Wessel, 2010). As expected  
296 from a maternally transmitted endosymbiont, all six tested host species harbored the bacterial  
297 infection within their PGCs (**Figure 4A**, left column). However, only PAU, WIL and STV hosts  
298 showed strict isolation of infection within the PGCs with infrequent bacterial localization in  
299 surrounding somatic tissue, whereas in MEL, SPT and TRO *Wolbachia* remained systemic  
300 ( $p < 0.001$ ; One-way ANOVA with Tukey HSD Test) (**Figure 4B**).

301 Additionally, using a similar approach but with the neuroblast-specific Deadpan antibody,  
302 we analyzed bacterial tropism in embryonic neuroblasts after their delamination from the  
303 neuroectoderm at stage 9-10 (**Figure 4A**, right column). Similar profound elimination of bacteria  
304 from somatic parts of the embryo (neuroblasts in this case) was observed in PAU, WIL and STV  
305 species in contrast to an ongoing systemic infection in MEL, SPT and TRO ( $p < 0.001$ ; One-way  
306 ANOVA with Tukey HSD Test). Already after delamination of the neuroblasts in pro-cephalic  
307 neurogenic region, which gives rise to the brain of an embryo, we detected only a very few nuclei  
308 associated with *Wolbachia* signals in species restricting the infection, whereas in the SIT hosts at  
309 least half of the neuroblasts contained the bacteria (**Figure 4A**, right column insets; **Figure 4C**).

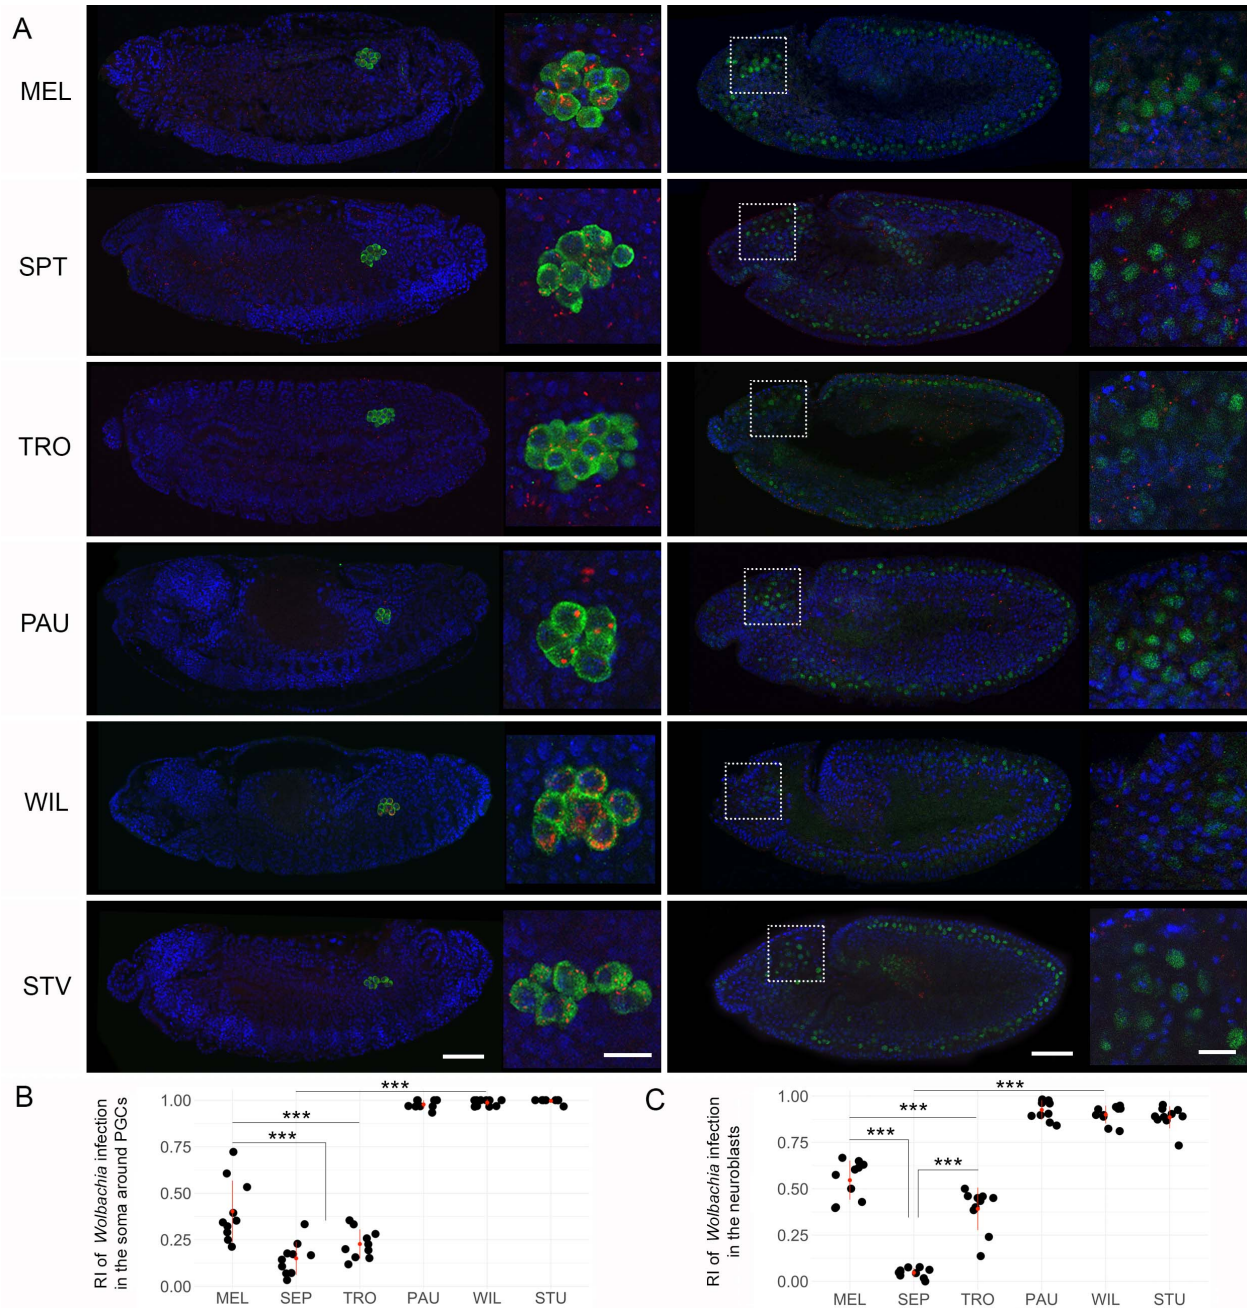

310

311 **Figure 4. *Wolbachia* tropism to primordial germ cells and neuroblasts of neotropical**  
 312 ***Drosophila* embryos.** Sequential FISH using *Wolbachia*-specific 16S rRNA probe (red) and  
 313 immunofluorescent staining of PGCs with anti-Vasa (left column, green) and neuroblasts with anti-  
 314 Deadpan (right column, green) antibodies on *Drosophila* embryos. DNA is stained with DAPI (blue)  
 315 (A). Determined RIs in the soma of neighboring PGCs (B) and in neuroblasts (C). In total ten  
 316 embryos were analyzed for every cell type (Supplemental data file). Asterisks denote statistical  
 317 significance (\*\*\*,  $p < 0.001$ ; One-way ANOVA with Tukey HSD Test). Red bars show standard  
 318 deviation, red dots designate the mean value. Scale bar: 50  $\mu\text{m}$  for embryos, 10  $\mu\text{m}$  for insets.  
 319



320 In summary, by systematically tracing the temporal and spatial dynamics of *Wolbachia*  
321 tropism *in situ*, we found that bacterial densities started to drop already before gastrulation (stage  
322 6-9) exclusively in three RIT species. The majority of *Wolbachia* accumulated mainly in PGCs but  
323 also in a few other cells of the embryo (neuroblasts and other undefined cell types). Hence, the  
324 restricted *Wolbachia* tropism found in the germline and the soma of PAU, WIL and STV flies is  
325 already determined before the onset of gastrulation, either by active host-directed elimination, or  
326 by dilution followed by selective replication of the native endosymbiont in some defined stem cells.  
327

### 328 **Autophagy eliminates *Wolbachia* in restricting species during early gastrulation.**

329  
330 Since we detected a dramatic decrease in bacterial titer already during embryogenesis, we  
331 hypothesized that active host-directed elimination of the endosymbiont is a more plausible  
332 mechanism of infection restriction than dilution and selective replication (**Figure 3B**). Autophagy  
333 was considered a potential mechanism for bacterial clearance because it has previously been  
334 demonstrated as a key cellular strategy for controlling *Wolbachia* density and tropism in *Brugia*  
335 *malayi* nematodes and *D. melanogaster* flies *in vivo*, as well as *in vitro* in cell lines of *D.*  
336 *melanogaster* and *Aedes albopictus* (Voronin et al., 2012). Moreover, it was recently shown that  
337 the density of *Wolbachia* in *D. melanogaster* is mediated by host autophagy in a cell type-  
338 dependent manner (Deehan et al., 2021). To test our hypothesis, we conducted sequential FISH  
339 and immunofluorescent analysis using an anti-GABARAP antibody, which is diagnostic for  
340 maturing autophagosomes in a cell. Since the drastic loss of somatic *Wolbachia* was clearly  
341 evident at mid-embryogenesis of restricted hosts (stage 6-9, see **Figure 3** middle row), we  
342 focused our analysis on early to late blastodermal embryos to study the temporal and spatial  
343 dynamics of the elimination process *in situ*. No signs of bacterial autophagy were found in somatic  
344 cells or in PGCs of systemic MEL, SPT and TRO hosts (**Figure 5 A-C; Figure S7**). However, in  
345 the soma of the restricted PAU, WIL and STV embryos, we clearly observed the formation of

346 GABARAP-positive rings around bacterial cells (**Figure 5D-F**). The earliest cases of *Wolbachia*  
347 engulfment were detected in blastodermal embryos (stage 5), with the highest peak in early  
348 gastrulation (stage 6) and only rarely at later stages (stage 7-8). Importantly, PGCs, which could  
349 be clearly recognized as an isolated cell cluster at posterior part of the embryo in late blastodermal  
350 or early gastrulating embryo, were devoid of any signs of bacterial autophagy in all three species  
351 with the restricted pattern (**Figure 5G-I**). This was in full agreement with our observations in later  
352 embryos that *Wolbachia* is preserved and maintained in the gonad precursor cells (**Figure 4A**,  
353 left column).

354 To further support our observation, we quantified the co-localization of GABARAP and FK2  
355 antibodies and *Wolbachia* cells using a JACoP plugin (Bolte and Cordelieres, 2006) for the  
356 imaging software Fiji (Shindelin et al., 2012). We found a pronounced overlap of autophagosomes  
357 and *Wolbachia* in somatic parts of the blastodermal and early gastrulating embryos (stage 5-6) of  
358 PAU, WIL and STV species with  $22.3 \pm 2.2\%$ ,  $25.8 \pm 3.4\%$  and  $15.5 \pm 4.1\%$ , respectively. By  
359 contrast, in somatic parts of earlier embryos (stage 3-4) and PGCs at both developmental stages  
360 of all six species we detected significantly less co-localization (between 0 and 2%) of *Wolbachia*  
361 with the antibody (Poisson regression:  $p < 0.001$ ), confirming that there is no clearance of bacterial  
362 infection at this stage (**Figure S8A**).

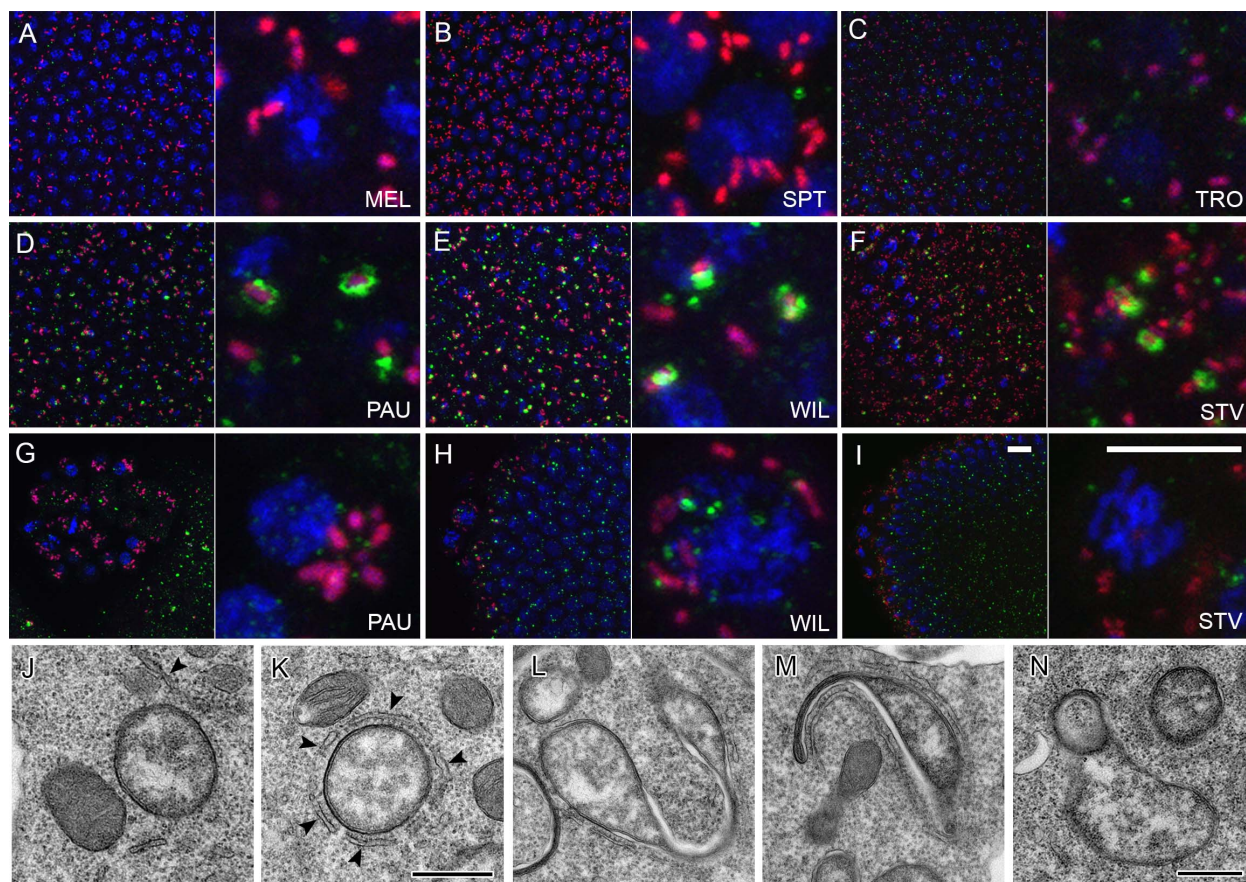

363

364 **Figure 5. Elimination of *Wolbachia* via autophagy in neotropical *Drosophila* embryos.**  
365 Sequential FISH using *Wolbachia*-specific 16S rRNA probe (red) and immunofluorescent staining  
366 with anti-GABARAP (green) antibody of embryos at stage 5 (A-I). Note the absence of autophagy  
367 in SIT species (A-C) and formation of autophagosomes (green rings) around *Wolbachia* in RIT  
368 species (D-F). Also note the absence of autophagy in PGCs of RIT species (G-I). Transmission  
369 electron microscopy on systemic MEL (J) and restrictive PAU (K) embryos at the cellularization  
370 and early gastrulation (stage 5-6). Contrary to MEL (J), tight physical associations between *w*Pau  
371 *Wolbachia* and the endoplasmic reticulum of restrictive PAU hosts (arrowheads) are prominent  
372 (K). Abnormal *w*Pau *Wolbachia* morphotypes (L-N) with signs of stretching (L), membrane  
373 extrusions (M) and vesicle formation (N). DNA is stained with DAPI (blue). Scale bar: 10  $\mu$ m for  
374 all fluorescent images, 0.5  $\mu$ m for TEM.

375

376

377

378

To further decipher the mechanistic basis of these intimate bacterial interactions with  
379 autophagosomes, we conducted an ultrastructural analysis of MEL and PAU embryos at  
380 cellularization and early gastrulation stage. Transmission electron microscopy (TEM) of PAU  
381 embryos at these stages revealed intimate interaction of *Wolbachia* with the endoplasmic  
382 reticulum (ER) of the host cell, contrary to MEL species, where no similar types of tight

383 associations were detected (**Figure 5J, K**). In most of the cases we observed rough ER  
384 membranes encircling the bacterial cells by close apposition but without direct contact (**Figure**  
385 **5K, Figure S9**). Later in early gastrulating PAU embryos, abnormal *Wolbachia* bacteria are  
386 dominant, exhibiting various signs of stretching, membrane extrusions and vesicle formation  
387 (**Figure 5L-N, Figure S9A-C**) that indicate symbiont degradation. No such structures were  
388 observed in MEL embryos at this stage. Surprisingly, we did not observe any autophagosome-  
389 like structures or traces of lysed bacteria at cellularization and early gastrulation, which is in  
390 contrast to clear co-localization of anti-GABARAP antibody and *Wolbachia* obtained with  
391 sequential FISH and immunofluorescent staining (**Figure 5D, Figure S8A**). The most plausible  
392 explanation of this observation is that autophagy of bacteria occurs in a non-canonical way. The  
393 abnormal *Wolbachia* forms we detected in early gastrulating embryos of restricting species  
394 support this hypothesis.

395         Besides anti-GABARAP, we also used an anti-FK2 antibody, which recognizes mono- and  
396 poly-ubiquitinated conjugates, to decipher whether bacteria are tagged for subsequent  
397 degradation. Consistent with our previous observations with anti-GABARAP staining, we did not  
398 detect any signs of ubiquitination of *Wolbachia* in MEL, SPT and TRO embryos at blastodermal  
399 and gastrulating stages (**Figure S9D-F**), including the PGCs (**Figure S7**). Furthermore, we did  
400 not detect frequent co-localization of anti-FK2 antibody and *Wolbachia* in PAU and STV embryos  
401 at both embryonic stages (**Figure S9G, I and Figure S8B**). Surprisingly, only WIL embryos  
402 exhibited pronounced ubiquitination signals associated with *Wolbachia* already at the  
403 blastodermal stage of embryogenesis (**Figure S9H**). The signal from the antibody staining was  
404 confined on one half of the bacterial surface, in contrast to the “ring”-like structures observed  
405 with anti-GABARAP (**Figure 5E**).

406         To sum up, analysis of blastodermal and early gastrulating embryos revealed that  
407 *Wolbachia* are most likely eliminated from the tissues of restricting hosts by autophagy mediated  
408 by intimate interactions of ER membranes with bacterial cells. While *wWil* bacteria are tagged

409 and presumably degraded in a ubiquitin-dependent manner, the two other native endosymbionts  
410 of PAU and STV are eliminated in a slightly different and most likely ubiquitin-independent way.  
411 The mechanistic basis of these observed differences awaits further studies in our laboratory.

412

413 **Host background plays a major role in regulating the pattern of *Wolbachia* tropism in the**  
414 **soma.**

415

416 To test the influence of each partner in this intimate symbiotic association, we conducted  
417 experiments with transinfected flies carrying different *Wolbachia* strains in the same host  
418 background. *Drosophila simulans* flies that are naturally infected with *Wolbachia* strains like *wAu*  
419 or *wRi*, demonstrating the SIT, were first cleared from the infection using antibiotics (now named  
420 *D. simulans* STC), and subsequently transinfected with *wWil* strain from *D. willistoni* via embryonic  
421 microinjections. Thus, a *Wolbachia* strain accommodated to the restricting host background was  
422 introduced into the SIT environment. In our experiment, the successfully transinfected line  
423 *wWil*/STC was kept in the lab for more than 10 years before starting further analyses on symbiont  
424 tropism in the *de novo* host background. Comparative FISH analysis of 3<sup>rd</sup> instar larval CNS and  
425 adult ovaries (stage 3-5) with *Wolbachia*-specific probes showed that the *de novo* *wWil* infection  
426 in *D. simulans* is not restricted as in *D. willistoni*, but systemic, similar to the globally dispersed  
427 patterns when infected with their natural strains of *Wolbachia* (**Figure 6A**).

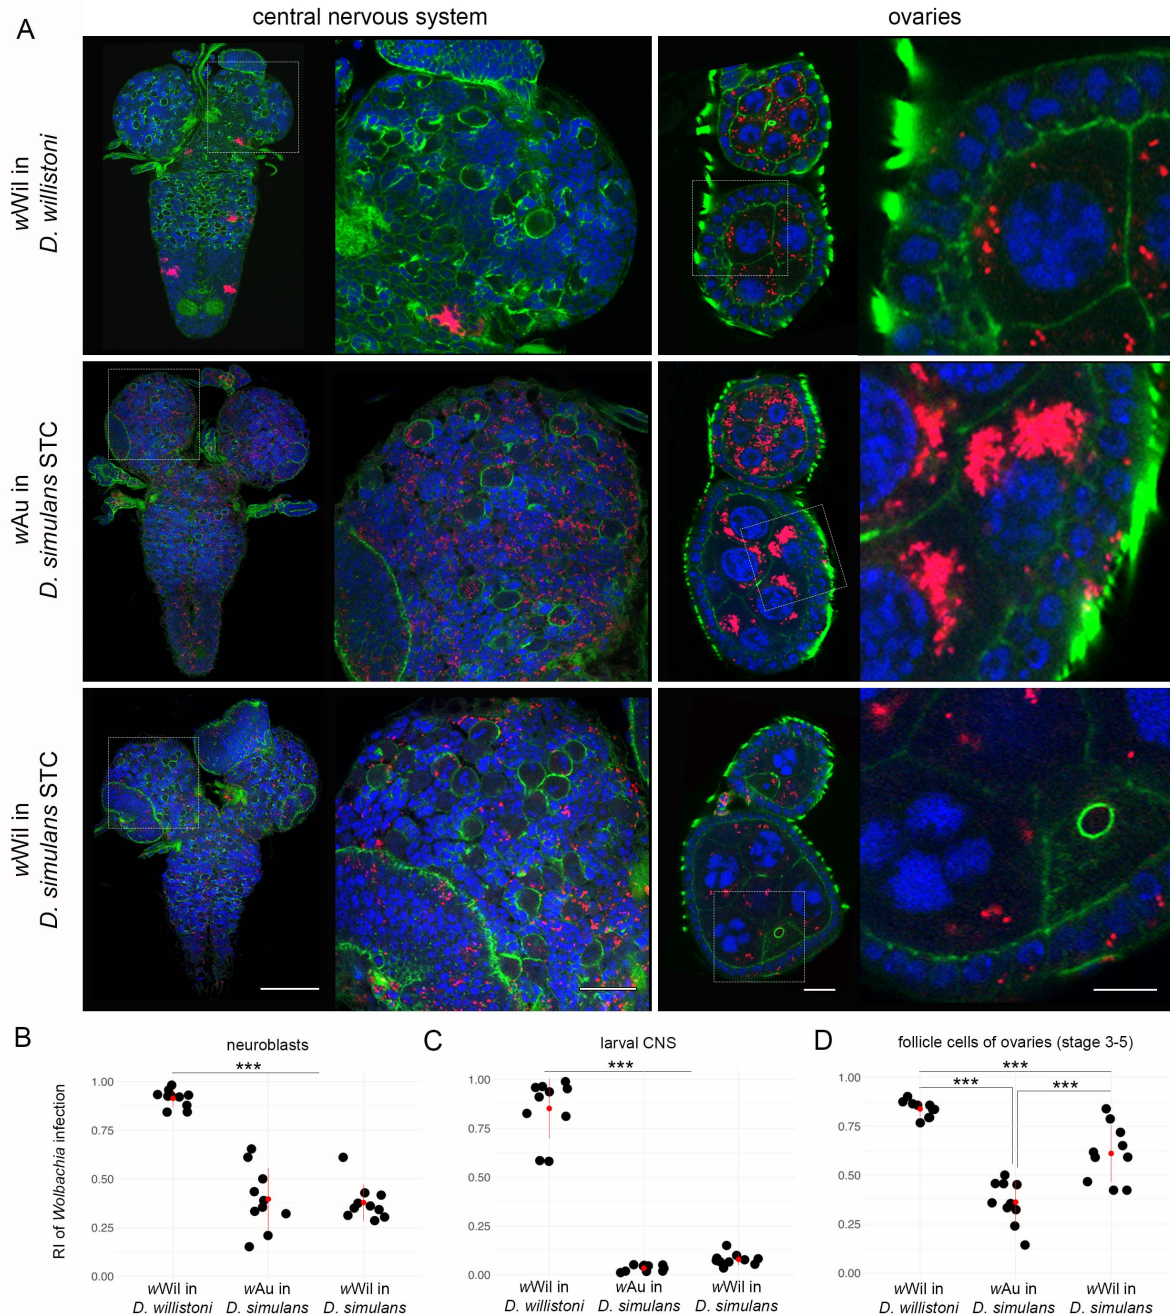

428

429 **Figure 6. Tropism of the restrictive wWil strain from *D. willistoni* in systemic *D. simulans***  
 430 **host.** Fluorescent *in situ* hybridization of different *Drosophila* 3<sup>rd</sup> instar larval CNS (**A**, left column)  
 431 and adult ovaries at stage 3-5 (**A**, right column) of *D. willistoni*, *D. simulans* and *D. simulans*  
 432 transinfected with wWil strain using 16S rRNA *Wolbachia*-specific probe (red). **B** demonstrates  
 433 the RI of bacteria in neuroblasts. **C** and **D** show the RIs of *Wolbachia* infection in the larval CNS  
 434 and follicle cells of adult ovaries, respectively. DNA is stained with DAPI (blue); actin is stained  
 435 with Phalloidin (green). For each *Drosophila* species 10 organs from each developmental stage  
 436 were analyzed (Supplemental data file). Asterisks denote statistical significance (\*\*\*,  $p < 0.001$ ;  
 437 One-way ANOVA with Tukey HSD Test). Red bars show standard deviation, red dots designate  
 438 the mean value. Scale bar: 20  $\mu\text{m}$ .

439 Quantification of the RI for infection of neuroblasts and whole larval CNS in *wWil*/STC  
440 (**Figure 6B, C**) confirmed the systemic nature of *wWil* localization in *D. simulans* with no difference  
441 to native *wAu* in *D. simulans* ( $p=0.93$  for neuroblasts and  $p=0.52$  for larval brains, One-way  
442 ANOVA with Tukey HSD Test), contrary to highly restricted tropism of *wWil* in its native *D. willistoni*  
443 background ( $p < 0.001$ , One-way ANOVA with Tukey HSD Test). Interestingly, the infection of  
444 follicle cells in the adult ovaries of transinfected *wWil*/STC flies was found to have a medium RI  
445 (**Figure 6D**) compared to systemic *wAu* in *D. simulans* ( $p<0.001$ , One-way ANOVA with Tukey  
446 HSD Test) and the highly restricted *wWil* strain in *D. willistoni* ( $p < 0.001$ , One-way ANOVA with  
447 Tukey HSD Test). Sequential FISH with *Wolbachia*-specific probes and immunofluorescence  
448 using anti-GABARAP and anti-FK2 antibodies on early embryos showed in contrary to *wWil* in *D.*  
449 *willistoni* no physical interaction of native *wAu* and *de novo wWil* with autophagosomes and the  
450 absence of ubiquitination in *D. simulans* hosts (**Figure 7A, B**, respectively). This observation was  
451 confirmed by quantitative co-localization of *Wolbachia* and the antibody signal using JACoP plugin  
452 in Fiji (**Figure S10**).

453 In summary, we observe that the host background plays a major role in regulating the  
454 distribution of the endosymbiont in its tissues.

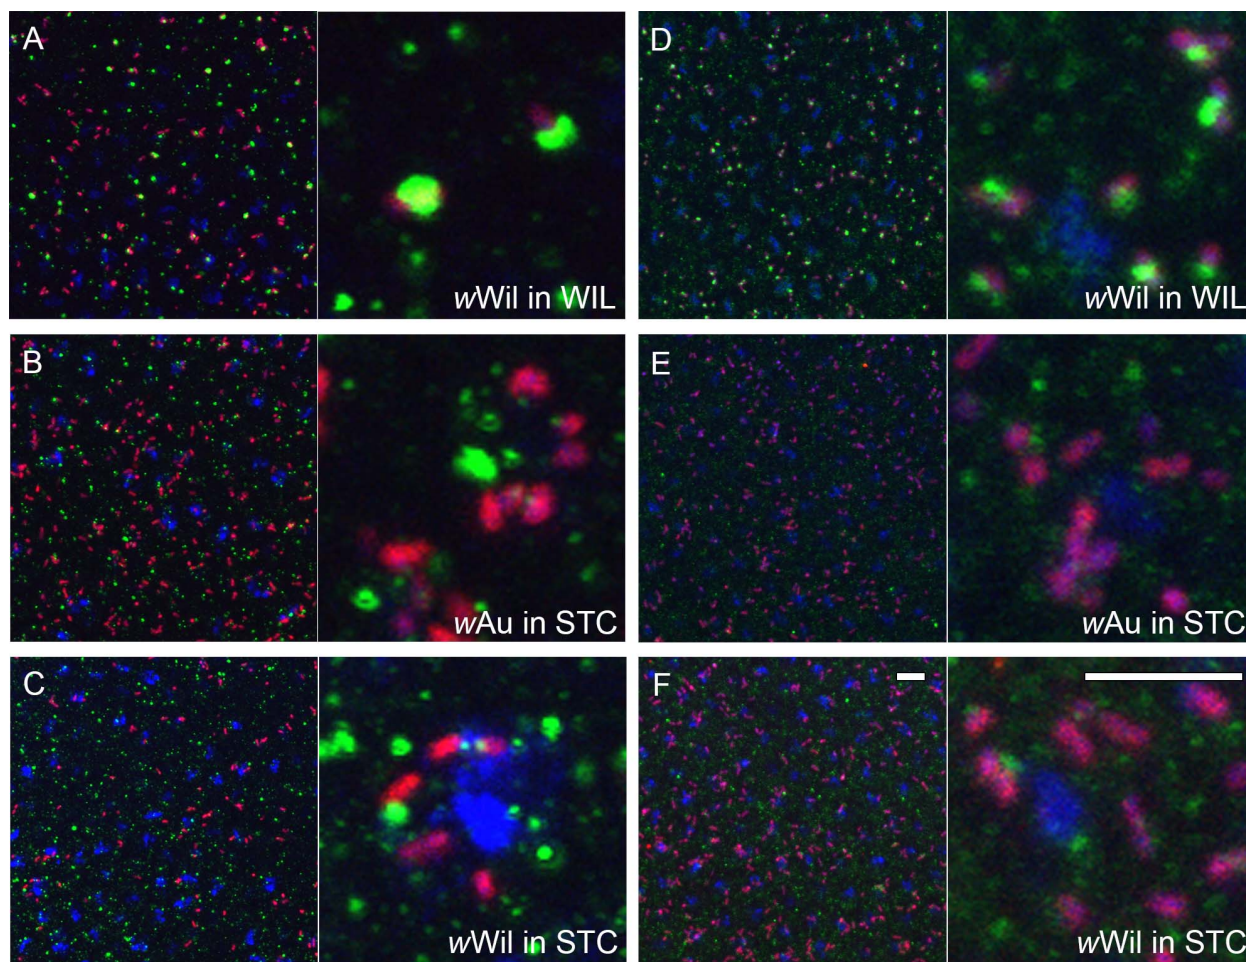

455

456 Figure 7. ***Wolbachia* interactions with the host cell.** Sequential FISH using *Wolbachia*-specific  
457 16S rRNA probe (red) and immunofluorescent staining with anti-GABARAP (A-C) and anti-FK2  
458 (D-F) antibodies on stage 6 embryos from *D. willsironi* (wWil in WIL), natively wAu-infected *D.*  
459 *simulans* (wAu in STC) and wWil-transinfected *D. simulans* (wWil in STC) lines. DNA is stained  
460 with DAPI (blue). Scale bar: 10  $\mu$ m.  
461



## 462 Discussion

463

464 In our previous study (Strunov et al., 2017), we demonstrated the remarkable restriction of  
465 *Wolbachia* bacteria to certain areas of the adult and larval central nervous system of *D.*  
466 *pauistorum* flies, which is in stark contrast to *D. melanogaster* and other insect hosts that usually  
467 harbor systemic bacterial infections in neuronal tissues (Min and Benzer 1997; Albertson et al.,  
468 2013; Strunov and Kiseleva, 2016). We hypothesized that the restricted tropism plus laterality of  
469 the endosymbiont to defined *D. pauistorum* brain regions might have evolved in order to keep  
470 the obligate mutualistic *Wolbachia* – *D. pauistorum* symbiosis in balance in a cost-benefit  
471 equilibrium, since it is essential for host's oogenesis and directs mating behavior of both sexes  
472 (Miller et al., 2010; Schneider et al., 2019).

473 To survey *Wolbachia* infection patterns more broadly, we analyzed bacteria-host  
474 interactions with focus on tropism by comparative and quantitative FISH analyses in several  
475 additional neotropical *Drosophila* species belonging to the willistoni and saltans species group.  
476 Based on sequence similarities, *Wolbachia* in both groups appear to be closely related to wAu-  
477 like strains, with the exception of wStv of *D. sturtevantii*, which differs significantly from the others  
478 (Bayraktar et al., 2010; Riegler et al., 2012; Martinez et al., 2021). In our present study we found  
479 that similar to wPau in *D. pauistorum*, native wWil *Wolbachia* are locally restricted in larval and  
480 adult brains, whereas *D. tropicalis*, a close relative to *D. willistoni*, exhibits clear patterns of the  
481 SIT, similar to wMel in *D. melanogaster*. In *D. septentrionsaltans*, a representative of the saltans  
482 species group, we found no signs of tropism in host flies carrying the wSpt *Wolbachia* strain that  
483 also belongs to the wAu-like group (Miller and Riegler, 2006; Riegler et al., 2012). In *D. sturtevantii*,  
484 however, wStv *Wolbachia* are locally restricted similarly to the RIT of wPau and wWil in native  
485 willistoni group hosts. Interestingly, the characteristic restriction pattern of wStv is also conserved  
486 in the closely related and newly described species *D. lehrmanae* (Madi-Ravazzi et al.,  
487 unpublished) that carries a similar wStv-like *Wolbachia* strain (Miller, unpublished).

488 *Tissue-tropism of Wolbachia has evolved at least twice in neotropical Drosophila hosts*

489  
490 In the current study we uncovered RIT patterns of the endosymbiont in three neotropical  
491 *Drosophila* hosts belonging to two different species groups that carry either *wAu*- or *wStv*-like  
492 *Wolbachia* variants. This finding suggests that the local restriction of the endosymbiont evolved  
493 at least two times independently in neotropical *Drosophila* by targeting two different *Wolbachia*  
494 variants – the closely related and more ancestral *wAu*-like strain in the lineage of *D. paulistorum*  
495 and *D. willistoni*, and the more recently acquired *wStv*-like bacteria of *D. sturtevantii* and *D.*  
496 *lehrmanae*. As *wAu*-like *Wolbachia* are conspecific and the dominating, most likely ancestral,  
497 infection type of neotropical *Drosophila* species (Miller and Riegler, 2006) we speculate that the  
498 last common ancestor of *D. sturtevantii* and *D. lehrmanae* might have carried a *wAu*-like strain  
499 too, which in the following got lost in competition with the arrival and successful establishment of  
500 the newly acquired *wStv* stain. Under the assumption that the ancestral *wAu* infection was  
501 similarly restricted to defined tissues as *wWil* and *wPau* in their native *willistoni* group prior to  
502 *Wolbachia* strain replacement, we hypothesize that the newly arrived and possibly more  
503 aggressive *wStv* variant became domesticated and attenuated in the same way as the ancestral  
504 *wAu*-like infection type before. By this, the host was already pre-adapted to costly *Wolbachia*  
505 infections by restricting and limiting the endosymbiont to defined somatic niches where the cost-  
506 benefit equilibrium was not disturbed. In order to test this hypothesis, however, more data on  
507 *Wolbachia* tropism will be essential from more species of the saltans group since to date only  
508 systemic infections of *wAu*-like strains were found in *D. septentrionsaltans* (this study) and *D.*  
509 *prosaltans* (Strunov, unpublished).

510

511 *Wolbachia tropism in adults is already determined in early embryos.*

512

513 Our comparative studies performed by systematic *Wolbachia*-specific FISH uncovered that adult

514 *D. paulistorum* and *D. willistoni* as well as *D. sturtevantii* flies, all natively infected by either wAu-  
515 or wStv-like strains, share similar patterns of local symbiont restrictions in their respective brains  
516 and ovaries. This RIT tropism is already manifested in early-mid embryogenesis by local  
517 restriction of the endosymbiont to the PGCs of the future germline and a few cell clusters of the  
518 soma (including neuroblasts) suggesting that both stem cell types might serve as the infection  
519 reservoir for the future imago.

520 We hypothesize that the massive reduction of bacterial titer in early embryogenesis is  
521 necessary to alleviate the burden of infection for the adult fly establishing the cost-benefit  
522 equilibrium in the system, since systemically infected species of PAU, WIL and STV were never  
523 observed in the lab as well as in recently collected wild specimens from French Guiana (data not  
524 shown). Semi-quantitative analyses of bacterial densities during early embryogenesis  
525 demonstrated that all three neotropical *Drosophila* with RIT patterns exhibit high titer *Wolbachia*  
526 infections (**Table 2**). In *D. tropicalis*, a close relative of *D. paulistorum* but exhibiting the SIT,  
527 *Wolbachia* titer in early embryos is stably low, and only slightly higher than in PAU, WIL and STV  
528 at later stages after bacterial elimination.

529 *Wolbachia* densities in embryos are strain-specific and being set in the unfertilized eggs  
530 during oogenesis (Serbus et al., 2008). After fertilization during the early nuclear divisions, they  
531 presumably do not replicate but only segregate (Lassy and Karr 1996; Miller unpublished). Thus,  
532 it seems likely that the smaller numbers of *Wolbachia* observed in early staged embryos of *D.*  
533 *tropicalis* are possibly below a critical threshold and less costly in hosts with SIT. In RIT hosts,  
534 higher densities seem detrimental and are hence avoided by elimination from most somatic parts  
535 of the embryo, which by natural selection leads to endosymbiont's restriction in the host. In  
536 contrast to *D. tropicalis*, in *D. septentrionalis*, another species with systemic *Wolbachia*  
537 infection, the bacterial titer is stably high in embryogenesis, however, at later developmental  
538 stages and especially in the imago the infection density decreases to MEL and TRO levels (**Table**  
539 **2**). This reduction might occur due to a dilution effect via endosymbiont dissemination all over the

540 developing organism during multiple cell divisions. In line with this idea, we previously  
541 demonstrated that some *D. paulistorum* semispecies harbor so-called low-titer *Wolbachia*  
542 infections (Miller et al., 2010) that are under the detection limit of standard PCR methods and  
543 hence more sensitive methods are needed for their identification (Arthofer et al., 2009; Miller et  
544 al., 2010; Schneider et al., 2014; Schneider et al., 2019; Baião et al., 2019).

545 We propose two main criteria for the establishment of *Wolbachia* tropism in symbiotic  
546 association: (i) the number of infected cells in late embryogenesis as a foundation of infection and  
547 (ii) the efficiency of *Wolbachia* transmission into dividing daughter cells during mitosis (**Table 2**).  
548 The first criterion represents a starting point with determined bacterial densities and localization,  
549 which is set in early-mid embryogenesis. In RIT hosts it occurs via directed elimination of bacteria  
550 from most somatic parts of the embryo and each infected pluripotent stem cell like PGC or  
551 neuroblast can be considered as a niche for the endosymbiont. The second criterion determines  
552 the future pattern of *Wolbachia* tropism in the adult fly by dissemination of infection from the niches  
553 by mitosis during development. The data on *Wolbachia* distribution in the nervous tissue of  
554 different *Drosophila* species across development demonstrated in this study and previously  
555 published (Albertson et al., 2009; Strunov et al., 2013) support this idea (summarized in **Figure**  
556 **S11**). In RIT hosts, the number of infected embryonic neuroblasts in the delaminated  
557 neuroectoderm is low due to extensive overall elimination of *Wolbachia* in the soma earlier in  
558 embryogenesis (**Figure S11A-C**). Later in development, these restricted infection niches give rise  
559 to clusters of bacterial infection in the larval CNS and adult brains, which differ in sizes depending  
560 on the transmission efficiency (**Figure S11A-C**). In the two systemic species with SIT, MEL and  
561 TRO, the ratio of infected neuroblasts is around 50% but the transmission efficiency is high  
562 enough to form multiple clusters of infection generating the SIT pattern (**Figure S11D, E**,  
563 respectively). In some species, not described in the present study, the dissemination of infection  
564 from the niches might be close to zero thus occupying only neuroblasts (**Figure S11F, I**). Finally,  
565 in SPT flies that also exhibit SIT the number of infected neuroblasts is almost 100% and the

566 efficiency of transmission is high, which leads to overall dissemination of infection in the adult fly  
 567 (Figure S11G, H).

568 The *Wolbachia* transinfection experiment, bringing *wWil* bacteria from the RIT host *D.*  
 569 *willistoni* into the SIT background of *D. simulans*, demonstrated that mainly the host background  
 570 regulates the distribution pattern of infection in somatic tissues. These data are not entirely  
 571 consistent with previous results for different *Drosophila* tissues, where in most cases the  
 572 *Wolbachia* strain determined the tropism (summarized in Table S1). Such a discrepancy might  
 573 be explained by different *Wolbachia* strategies to infect reproductive and somatic tissues. For  
 574 instance, our data demonstrated that *Wolbachia* localization pattern is not strictly regulated by the  
 575 host in follicle cells of adult ovaries from transinfected line (*wWil*/STC).

576

577 **Table 2.** Summarized characteristics of *Wolbachia* strains in native and novel hosts analyzed in  
 578 the present study.

| <i>Wolbachia</i> strain/ <i>Drosophila</i> species | <i>Wolbachia</i> distribution pattern | <i>Wolbachia</i> titer in embryogenesis |     |      | <i>Wolbachia</i> titer in the nurse cells and oocyte | <i>Wolbachia</i> titer in the neuroblasts | The number of infected cells in late embryogenesis | <i>Wolbachia</i> transmission efficiency to the daughter cell |
|----------------------------------------------------|---------------------------------------|-----------------------------------------|-----|------|------------------------------------------------------|-------------------------------------------|----------------------------------------------------|---------------------------------------------------------------|
|                                                    |                                       | early                                   | mid | late |                                                      |                                           |                                                    |                                                               |
| <i>wMel/D. melanogaster</i>                        | systemic                              | ++                                      | ++  | ++   | +                                                    | +++                                       | +++                                                | ++                                                            |
| <i>wSpt/D. septentrionalis</i>                     | systemic                              | +++                                     | +++ | +++  | +                                                    | +                                         | +++                                                | +++                                                           |
| <i>wTro/D. tropicalis</i>                          | systemic                              | ++                                      | ++  | ++   | +                                                    | +                                         | +++                                                | ++                                                            |
| <i>wPau/D. paulistorum</i>                         | restricted                            | +++                                     | ++  | +    | +++                                                  | ++                                        | +                                                  | +                                                             |
| <i>wWil/D. willistoni</i>                          | restricted                            | +++                                     | ++  | +    | +++                                                  | ++                                        | +                                                  | +                                                             |
| <i>wStv/D. sturtevantii</i>                        | restricted                            | +++                                     | ++  | +    | +++                                                  | +++                                       | +                                                  | +                                                             |
| <i>wAu/D. simulans</i>                             | systemic                              | ++                                      | ++  | ++   | +++                                                  | +                                         | +++                                                | ++                                                            |
| <i>wWil/D. simulans</i>                            | systemic                              | ++                                      | ++  | ++   | ++                                                   | +                                         | +++                                                | ++                                                            |

579

580

581 *Autophagy is a key mechanism, eliminating Wolbachia during early Drosophila embryogenesis.*

582

583 Understanding the host-symbiont interaction regarding tropism and density control in the  
584 *Wolbachia-Drosophila* model system is of great importance for deciphering the essence of inter-  
585 kingdom relationships, which could be also applied to *Wolbachia*-mosquito and other symbiotic  
586 associations.

587 In three out of six *Drosophila* species analyzed in the present study we observe high  
588 restriction of *Wolbachia* to certain areas in some somatic tissues and their accumulation in  
589 reproductive organs of the host. This restriction occurs in early embryogenesis during the narrow  
590 time window between cellularization (stage 5) and early gastrulation (stage 6-7) with the infection  
591 being substantially reduced in the somatic part but staying high in PGCs. This massive somatic  
592 elimination of *Wolbachia* coincides with maternal-to-zygotic transition in *Drosophila*  
593 embryogenesis, which is marked by extensive degradation of deposited maternal mRNA and  
594 activation of zygotic gene expression (Tadros and Lipshitz, 2009). In this study we were able to  
595 dissect the process of *Wolbachia* clearance stepwise and demonstrate that bacteria are removed  
596 from the soma of RIT embryos via autophagy, which is schematically summarized in **Figure 8**. To  
597 our knowledge, this is the first example of autophagy-mediated regulation of bacterial densities  
598 during early development of the host.

599

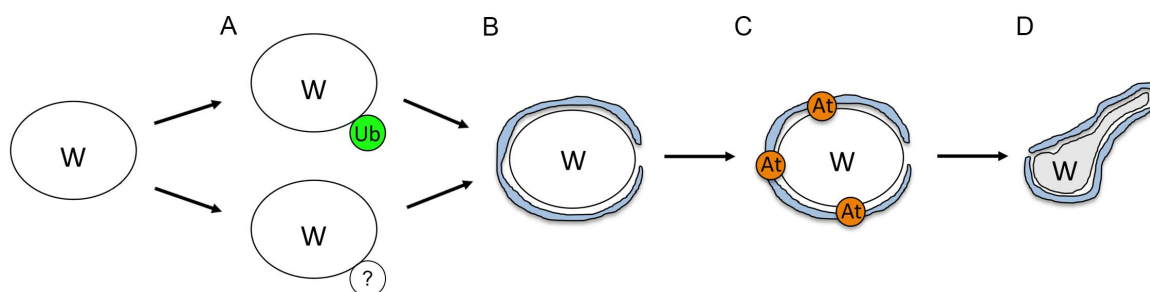

600

601 **Figure 8. A scheme of *Wolbachia* elimination process during early host embryogenesis. A**  
602 denotes the first step in infection elimination - ubiquitination (Ub), which is active in WIL hosts and

603 absent in PAU and WIL. **B** demonstrates a second step - the encircling of the bacteria by ER  
604 membranes. **C** shows a third step – the attraction of autophagy machinery to the vesicle formed  
605 by ER. **D** depicts the last step – degradation of bacteria through yet undescribed mechanism.  
606

607         We propose that the first step of the bacterial elimination process is ubiquitination of the  
608 endosymbiont (**Figure 8A**). It is generally used by cells to tag proteins for proteasomal  
609 degradation (Weissman, 2001), but is also known for targeting intracellular bacteria for further  
610 elimination via autophagy during cellular defence against infections (Fujita and Yoshimori, 2011).  
611 In our study, however, we observe co-localization of ubiquitin with *Wolbachia* only in WIL species,  
612 whereas the other two RIT hosts PAU and STV showed low or no signs of it. Near absence of co-  
613 localization of ubiquitin with the native endosymbionts suggests that in these two hosts *Wolbachia*  
614 elimination occurs through ubiquitin-independent pathway (Khaminets et al., 2016). In contrast to  
615 *wWil*, *wPau* and *wStv* *Wolbachia*, might have evolved a mechanism to remove the ubiquitination  
616 mark but still be cleared with autophagy through a different pathway. It was recently demonstrated  
617 that the *wMelCS* strain, but not the closely related *wMel*, might have developed a trick to subvert  
618 the autophagy machinery by actively avoiding the ubiquitination in *D. melanogaster* hub cells  
619 (Deehan et al., 2021). These data show that even closely related *Wolbachia* strains exhibit stark  
620 differences in interaction with the host machinery, which might also be the case in our study. In  
621 addition, a few seemingly ubiquitinated bacteria were detected in systemic species as well as in  
622 PGCs of restricted species, suggesting that these single foci might be the false-positive signals  
623 derived from proteasomal degradation of proteins associated with ER (Meusser et al., 2005). As  
624 shown earlier, *Wolbachia* rely on host proteolysis to maintain a high titer within a cell and hence  
625 are closely interacting with the ER membranes (White et al., 2017). Therefore, we cannot dismiss  
626 the possibility that some of the interactions between ubiquitin and *Wolbachia* observed in the  
627 soma of WIL species are also false positive. However, the more pronounced pattern and higher  
628 number of co-localizations support the idea of bacterial tagging by ubiquitin for degradation in this  
629 RIT host.

630           The second step of bacterial elimination is characterized by ER membranes encircling the  
631 endosymbiont (**Figure 8B**). Various intracellular bacteria exhibit intimate contacts with the ER  
632 since it is a nutrient-rich organelle that is devoid of bactericidal effectors and thereby provides a  
633 safe niche for endosymbionts to survive and replicate (reviewed in Celli and Tsolis, 2015). As  
634 demonstrated in earlier studies, *Wolbachia* exerts close interaction with the ER membranes in  
635 different *D. melanogaster* tissues as well as in fly-derived cell lines (Voronin et al., 2004; Serbus  
636 et al., 2011; Strunov et al., 2016; White et al., 2017; Fattouh et al., 2019). Additionally,  
637 endosymbionts most likely receive the third outer membrane from the ER, which helps them to  
638 escape a cellular defence system (reviewed in Serbus et al., 2008). The ER, however, is not  
639 always a friendly environment for bacteria. Disruption of the secretory pathway by active  
640 endosymbiont interaction, causing ER stress, might lead to recognition by the innate immune  
641 system and cell defence response (reviewed in Celli and Tsolis, 2015). Moreover, the ER seems  
642 to provide a cradle for autophagosome formation (Hayashi-Nishino et al., 2009), which might  
643 ameliorate the elimination of bacteria. In our TEM studies we uncovered intimate interaction of  
644 rough ER membranes with *Wolbachia* in PAU embryos during the symbiont's elimination process,  
645 which is in contrast to MEL embryos with rare and significantly lesser intimate contacts. Based on  
646 the results of our antibody staining against GABARAP, we speculate that ER membranes  
647 surrounding *Wolbachia* in PAU embryos serve as a scaffold for autophagosome formation. The  
648 role of ER membranes in the degeneration of bacteriocytes was also shown for the symbiotic  
649 Buchnera-Aphid system (Simonet et al., 2018). Additionally, ER encircling was recently  
650 demonstrated for damaged mitochondria elimination via mitophagy in mouse embryonic  
651 fibroblasts (Zachari et al., 2019). Very similar to our observation, not fully functional mitochondria  
652 are first ubiquitinated and then surrounded by ER strands, which provide a platform for  
653 mitophagosome formation and further degradation of the organelle. Given that mitochondria have  
654 alphaproteobacterial ancestry, both observations mentioned above strongly support our  
655 hypothesis of ER playing a key role in the somatic elimination of the  $\alpha$ -proteobacteria *Wolbachia*



656 in early RIT embryos by forming a cradle for autophagosome maturation.

657         The third step of bacterial elimination process is attraction of the autophagy machinery  
658 followed by autophagosome maturation (**Figure 8C**). It is known that autophagy plays an  
659 important role in defending the host cell against pathogens but in some cases the autophagy  
660 machinery can be hijacked by the intruder for its own survival (reviewed in Huang and Brumell,  
661 2014). In systems with a mutualistic type of interaction, autophagy might be a key player in  
662 keeping the cost-benefit equilibrium in balance. Also for facultative symbiotic associations it was  
663 shown that *Wolbachia* density is regulated by autophagy (Voronin et al., 2012; Le Clec'h et al.,  
664 2012; Deehan et al., 2021). In our study, we observed *Wolbachia* accumulation mostly in PGCs  
665 during embryogenesis, whereas the rest of infection in the somatic part is being massively  
666 eliminated and subsequently restricted to certain isolated areas. Eventually, the adult flies exhibit  
667 highly abundant infection within the reproductive part of the gonad (nurse cells and oocyte) and  
668 restricted infection in somatic part, like follicle cells and nervous tissues. Such a specific tropism  
669 with a safe niche for bacteria in embryonic PGCs can be explained from the perspective of both  
670 symbiotic partners. On one hand, for ensuring their own maternal transmission, *Wolbachia* might  
671 specifically avoid autophagy in gonad precursors by actively blocking it with unknown effector  
672 proteins, which are released via type IV secretion system. As shown in the literature, some  
673 bacteria are able to counteract the host defence system by selectively preventing any of these  
674 three steps: detection, autophagy initiation or autophagosome formation (reviewed in Kimmey  
675 and Stallings, 2016; Wu and Li, 2019). This defence strategy of the symbiont also coincides with  
676 the downregulation of autophagy genes as observed in ovaries of the wasp *Asobara tabida* and  
677 the woodlouse *Armadillidium vulgare* (Kremer et al., 2012; Chevalier et al., 2012). Additionally, a  
678 recent study demonstrated that *wMelCS* strain of *Wolbachia* evolved a mechanism to subvert  
679 host autophagy in order to survive in hub cells and both *wMel* and *wMelCS* are able to avoid  
680 elimination in the developing egg (Deehan et al., 2021). On the other hand, the PGCs themselves  
681 might lack extensive autophagic activity and thereby provide a safe environment for the

682 *Wolbachia* to survive, replicate and being successfully transmitted via oocytes. In contrast to  
683 somatic cells, PGCs are transcriptionally quiescent during early embryonic stages (Cinalli et al.,  
684 2008) and activated only at later stages during their migration (Van Doren et al., 1998). It is  
685 conceivable that autophagy is blocked or impeded in germline stem cells during this quiescent  
686 state. Although, for this study, we did not conduct additional experiments to decipher the  
687 mechanism of preservation of bacterial infection in PGCs, it appears to be more plausible that the  
688 cell-specificity in development is a key regulator for *Wolbachia*'s fate. Thereby, during this critical  
689 step in early embryogenesis, PGCs are serving a safe haven for the maternally transmitted  
690 endosymbiont within the hostile somatic environment of massive autophagy in *Drosophila* species  
691 with the RIT phenotype.

692         The final step of the bacterial elimination process is degradation (**Figure 8D**). In our TEM  
693 studies we observed several abnormalities of *Wolbachia* morphology in the soma of PAU embryos  
694 during elimination of infection like stretching, bending and membrane vesiculation. Usually dying  
695 *Wolbachia* exhibit shrivelled, electron-dense structures surrounded by autophagosomal  
696 membranes (Wright and Barr, 1980; Min and Benzer, 1997; Zhukova and Kiseleva, 2012; Strunov  
697 et al., 2016), but the abnormalities observed in our study on RIT embryos are unique and  
698 represent a yet uncommon way of bacterial degradation. Although not found before with bacteria  
699 but associated with organelles, similarly stretched and bended structures were reported about  
700 stressed mitochondria in murine embryonic fibroblasts (Ding et al., 2012) and other mouse tissues  
701 (Gautam et al., 2019), linking these morphological deformations to autophagosome maturation  
702 by engulfing the cytoplasm and subsequent organelle degradation. In the latter more recent study,  
703 actual autophagosome formation was not confirmed by antibody staining but the authors  
704 speculated that mitochondria can undergo a self-destruction process, called mitoautophagy  
705 (Gautam et al., 2019). Morphologically similar ultrastructural abnormalities were also found with  
706 plastids of *Brassica napus* plants during the developmental switch from microspores to  
707 embryogenesis. Here, the authors experimentally verified these abnormal plastids with

708 autophagosome formation and further elimination (Parra-Vega et al., 2015). Taken together, the  
709 discovered deformities of *Wolbachia* morphology in embryogenesis of RIT *Drosophila* hosts most  
710 likely represent the first report of a non-canonical degradation process of bacteria through  
711 autophagy, which was only found in organelles before.

712

## 713 **Conclusion**

714

715 In the present study we reconstructed the mechanism of restricting *Wolbachia* infection by  
716 autophagy in three different neotropical *Drosophila* species. These data present a unique way of  
717 symbiont density regulation by the host during a specific period in embryogenesis, which  
718 coincides with maternal-to-zygote transition. They also demonstrate how the cost-benefit  
719 equilibrium between the host and the symbiont is maintained long-term by keeping a safe niche  
720 in the reproductive part, thereby being transmitted to the next generation, while being eliminated  
721 from most of the somatic part to reduce potential costs. It is still unclear how *Wolbachia* escapes  
722 elimination in PGCs and in the soma of systemic species. One possibility is a unique marker on  
723 the bacterial surface, which is specifically recognized by a native host but further transinfection  
724 experiments with various *Wolbachia* strains into different *Drosophila* backgrounds might give us  
725 the answers.

## 726 **Acknowledgements**

727

728 We thank Matthias Schäfer and Silvia Bulgheresi for critical and constructive discussions during  
729 the whole period of the project and for providing the antibodies Matthias Schäfer (Medical  
730 University of Vienna), the groups of Fumiyo Ikeda (IMBA) and Sasha Marten (MFPL), as well as  
731 Thomas Hummel (University of Vienna) and Anne Ephrussi (EMBL). We thank Ivanna Fedorenko  
732 from Katy Schmidt's group for substantial and excellent technical support. We are also very

733 thankful to Aurélie Hua-Van for fly sampling in French Guiana, France, and the Nouragues  
734 research field station (managed by CNRS), which benefits from “Investissement d'Avenir” grants  
735 managed by Agence Nationale de la Recherche (AnaEE France ANR-11-INBS-0001; Labex  
736 CEBA ANR-10-LABX-25-01) to WMJ. The project was funded by the Austrian Science Fund FWF  
737 grants P28255-B22 to WJM and P32275 to MK

738  
739  
740  
741

## 742 **Materials and methods**

743

### 744 *Fly stocks and husbandry*

745  
746 Seven different species from four *Drosophila* subgroups were used in this study: *D. melanogaster*  
747 (MEL) and *D. simulans* (melanogaster subgroup), *D. paulistorum* (PAU), *D. willistoni* (WIL), *D.*  
748 *tropicalis* (TRO) (willistoni subgroup), *D. septentriosaltans* (SPT) (saltans subgroup) and *D.*  
749 *sturtevantii* (STV) (sturtevantii subgroup). All the species mentioned above were naturally infected  
750 with specific *Wolbachia* strain (*wMel*, *wAu*, *wPau*, *wWil*, *wTro*, *wSpt* and *wStv*, respectively).  
751 Additionally, the stably transfected *wWil*/STC line was used in the experiment, generated in  
752 2006 by injecting *wWil Wolbachia* from *D. willistoni* into *D. simulans* STC early embryos, which  
753 were cleared from the native *wAu Wolbachia* with antibiotics. For more details on flies used in the  
754 study see the **Table 1**. All lines were kept at 22–25°C on a 12 h light-dark cycle and fed a typical  
755 molasses, yeasts, cornmeal and agar food.

756

### 757 *RNA-DNA fluorescent in situ hybridization*

758  
759 Tissues (adult brains, larval CNS, adult ovaries, larval ovaries) from at least ten females per  
760 *Drosophila* species/line were dissected in ice-cold RNase-free 1x phosphate buffered saline (PBS)  
761 and fixed in 3.7% formaldehyde in RNase-free PBS for 15-20 min at room temperature and

762 consequently washed 3 times 5 min each with PBTX (1xPBS, 0.3% Triton-X 100). Embryos from  
763 listed *Drosophila* species were collected and fixed according to a standard protocol (Rothwell and  
764 Sullivan et al., 2007).

765 All fixed samples were hydrated in prewarmed 4xSSC buffer with 10% formamide and  
766 hybridized at 37 °C overnight in the same buffer containing 10% of dextran sulfate and 0.5 nmol  
767 of W1/W2 probes specifically targeting *Wolbachia* 16S rRNA (Heddi et al., 1999) labeled with  
768 Oregon Green (488) or Texas Red (596) fluorophore. Samples were then washed twice for 30  
769 min at 37 °C in prewarmed 4xSSC buffer with 10% formamide. For preparation of larval CNS,  
770 ovaries and adult ovaries, tissues were additionally incubated in Alexa Fluor 488 phalloidin  
771 (Invitrogen, USA; 1:100 dilution in 1xPBS) for 1h at room temperature to stain F-actin. Finally,  
772 after washing samples 2 times with 1x PBS, they were mounted in Roti®-Mount FluorCare with  
773 DAPI (Carl Roth, Germany) on microscope slides.

774 Samples were analyzed on Olympus FluoView FV3000 confocal microscope. Beam paths  
775 were adjusted to excitation/emission peaks of used fluorophores: 569/591 nm for CAL Fluor Red  
776 590 (*Wolbachia*), 488 nm for phalloidin and 350/450 nm for 4',6-diamidin-2-phenylindol (DAPI).

777  
778 *FISH combined with immunofluorescence (FISH/IF)*

779  
780 For combination of FISH with antibody staining we first conducted *in situ* hybridization as  
781 described in the section above. After washing steps in prewarmed 4xSSC buffer samples were  
782 incubated in 5% bovine serum albumin (BSA) for 1h at room temperature constantly shaking.  
783 Then they were washed once with 1%BSA and incubated with a primary antibody (diluted in  
784 1xPBTX with 1%BSA) overnight at 4°C constantly shaking. The following day the samples were  
785 washed 3 times 10 min each in 1xPBTX and incubated in a secondary antibody (diluted in 1xPBTX  
786 with 1%BSA) for 1h at room temperature constantly shaking. After washing 3 times 10 min each  
787 with 1xPBTX samples were stained with Alexa Fluor 488 phalloidin (Invitrogen, USA; 1:100

788 dilution in 1xPBS). Then they were washed 2 times with 1x PBS and mounted in Roti®-Mount  
789 FluorCare with DAPI (Carl Roth, Germany) on microscope slides

790

### 791 *Antibodies*

792

793 The following primary antibodies were used in this study: anti-Deadpan (guinea pig, polyclonal;  
794 1:1000; Eroglu et al., 2014), anti-Asense (guinea pig, polyclonal; 1:100; Eroglu et al., 2014), anti-  
795 Repo (rabbit, polyclonal; 1:1000; gift of G. Technau), anti-Vasa (rat, polyclonal; 1:500; gift of A.  
796 Ephrussi), anti-GABARAP (rabbit, polyclonal; 1:200; gift of S. Martens), anti-FK2 (mouse,  
797 monoclonal; 1:200; gift of F. Ikeda), anti-GRP78/BiP (rabbit, polyclonal; 1:500; Abcam, Cambridge,  
798 UK). The following secondary antibodies were used in this study: goat anti-mouse Alexa Fluor  
799 488 (1:500), goat anti-mouse Cy5 (1:500), goat anti-rabbit Alexa Fluor 488 (1:500), goat anti-  
800 guinea pig Cy3 (1:500), goat anti-rat Alexa Fluor 488 (1:500). All secondary antibodies were  
801 obtained from Invitrogen, USA.

802

### 803 *Transmission electron microscopy*

804

805 *Drosophila* embryos were collected the same way as for FISH and then fixed in 2.5% (w/v)  
806 glutaraldehyde in 0.1 M sodium cacodylate buffer (pH 7.2) for 2.5 h. This was followed by three  
807 washes in the same buffer for 5 min each and post-fixation in 1% (w/v) OsO<sub>4</sub> and 0.8% (w/v)  
808 potassium ferrocyanide for 1 h. Samples were then placed in a 1% aqueous solution of uranyl  
809 acetate (Serva, Heidelberg, Germany) for 12 h at 4°C and dehydrated in an ethanol series (30%,  
810 50%, 70%, 96% for 10 min, and 100% for 20 min) and acetone (twice, for 20 min). Ultra-thin  
811 sections of embedded samples (Agar 100 Resin; Agar Scientific Ltd., Essex, UK) were obtained  
812 with a Reichert-Jung ultracut microtome, stained with Reynolds lead citrate and examined in an  
813 FEI Tecnai 20 electron microscope (FEI Eindhoven, Netherlands) equipped with 4K Eagle CCD

814 camera. Images were processed with Adobe Photoshop.

815

816 *Analysis and quantification of Wolbachia localization in the tissue*

817

818 Calculation of restriction index (RI), aggregation of infection and *Wolbachia* density:

819 We define a restriction index (RI) to quantify the pattern of *Wolbachia* localization as number of  
820 uninfected cells divided by total number of cells:

$$821 \quad \text{RI} = \frac{F_{uninfected}}{F_{total}}$$

822  $F_{uninfected}$  and  $F_{total}$  in adult brains and larval CNS was calculated by superimposing a grid (25x25 $\mu\text{m}$ )  
823 on the whole tissue image in Photoshop CS6 and quantifying the number of uninfected and total  
824 number of grids containing the tissue. The RI value varied from 0 (no restriction) to 1 (full  
825 restriction). In total, 10 samples per each *Drosophila* species and each tissue were analyzed  
826 (more than 1200 grid cells for adult brains and approximately 400 grid cells for larval nervous  
827 tissues of each species).

828 The RI of infection in adult and larval ovaries was calculated by dividing the number of  
829 uninfected follicle cells from a central section of egg chamber (for the former) or somatic cells  
830 related to terminal filament (for the latter) to the total number of cells analyzed. In total, 10 samples  
831 per each *Drosophila* species and each tissue were analyzed (more than 400 cells for adult ovaries  
832 and more than 170 cells for larval ovaries of each species). The RI of infection in somatic cells  
833 around primordial germ cells (PGCs) in embryos was quantified by drawing a 50x50 $\mu\text{m}$  square  
834 around PGCs, counting the number of uninfected cells within this square and dividing it to the  
835 total number of cells. In total, 10 samples per each *Drosophila* species and each tissue were  
836 analyzed (more than 300 cells for each species).

837 The RI of infection in neuroblasts of embryonic head was quantified by counting the  
838 number of uninfected cells (stained with anti-Deadpan antibody specific to neuroblasts) and

839 dividing it to the total number of neuroblasts. In total, 10 samples per each *Drosophila* species  
840 and each tissue were analyzed (more than 400 neuroblasts for each species).

841 Aggregation of *Wolbachia* in larval CNS was calculated by quantifying the average number of  
842 infected neighboring cells forming a cluster in each tissue. In total, 8 samples per each *Drosophila*  
843 species were analyzed (61-65 cell clusters for SIT, 26-32 cell clusters for RIT and 56 cell clusters  
844 for transinfected line).

845 *Wolbachia* density within a neuroblast of larval CNS, within an egg chamber of an ovary  
846 or an embryo was quantified with Fiji (Schindelin et al., 2012) by measuring the area of bacterial  
847 signal within the region of interest (ROI) and dividing it to the total area of the ROI. In total, at least  
848 5-10 samples per each *Drosophila* species and each tissue were analyzed. The detailed  
849 description of this procedure can be found in Strunov et al., 2017.

850

851 *Statistics.*

852

853 All statistical analyses were carried out using *R* version 3.3.2 (R-Core Team, 2020). For *Wolbachia*  
854 distribution in adult and larval brains and ovaries we analyzed the count data based on  
855 generalized linear models (GLM) with a Poisson error structure. To test for significance of a given  
856 predictor variable, we compared the full model including all factors to a reduced model excluding  
857 the given factor by analysis of deviance with  $\chi^2$  tests using the *R* function *anova*. For the rest of  
858 the data, we assume that the data is normally distributed and calculated one-way ANOVAs. We  
859 further applied post-hoc Tukey HSD test to test for significant difference among factor levels using  
860 the *R* function *TukeyHSD*.

861



## 862 References

863

- 864 1. Kaur R., Shropshire J.D.L., Cross K., Leigh B.J., Mansueto A., Stewart, V.R., Bordenstein  
865 S.R., Bordenstein S. 2021. Living in the Endosymbiotic World of *Wolbachia*: A Centennial  
866 Review. Preprints 2021. doi: 10.20944/preprints202103.0338.v1.
- 867 2. Min KT, Benzer S. 1997. *Wolbachia*, normally a symbiont of *Drosophila*, can be virulent,  
868 causing degeneration and early death. Proc Natl Acad Sci U S A. 94, 10792–10796. doi:  
869 10.1073/pnas.94.20.10792.
- 870 3. Dedeine F, Bandi C, Boule´treau M, Kramer LH. 2003. Insights into *Wolbachia* obligatory  
871 symbiosis. Pp. 267–282 in K. Bourtzis and T. Miller, ed. Insect symbiosis. CRC Press,  
872 Boca Raton, FL. doi: 10.1201/9780203009918.ch16.
- 873 4. Taylor MJ, Bandi C, Hoerauf A. 2005. *Wolbachia* bacterial endosymbionts of filarial  
874 nematodes. Adv Parasitol 60: 245– 284. doi: 10.1016/S0065-308X(05)60004-8.
- 875 5. Hosokawa T, Koga R, Kikuchi Y, Meng XY, Fukatsu T. 2010. *Wolbachia* as a bacteriocyte-  
876 associated nutritional mutualist. Proc Natl Acad Sci U S A 107:769–774. doi:  
877 10.1073/pnas.0911476107.
- 878 6. Miller WJ, Ehrman L, Schneider D. 2010. Infectious speciation revisited: Impact of  
879 symbiont- depletion on female fitness and mating behavior of *Drosophila paulistorum*.  
880 Plos Pathog. 6(12):e1001214. doi: 10.1371/journal.ppat.1001214.
- 881 7. Schneider DI, Ehrman L, Engl T, Kaltenpoth M, Hua-Van A, Le Rouzic A, Miller WJ. 2019.  
882 Symbiont-Driven Male Mating Success in the Neotropical *Drosophila paulistorum*  
883 Superspecies. Behav Genet. 49(1):83-98. doi: 10.1007/s10519-018-9937-8.
- 884 8. Werren JH, Baldo L, Clark ME. 2008. *Wolbachia*: master manipulators of invertebrate  
885 biology. Nat Rev Microbiol. 6(10):741-51. doi: 10.1038/nrmicro1969.
- 886 9. Landmann F. 2019. The *Wolbachia* Endosymbionts. Microbiol Spectr. 7(2). doi:  
887 10.1128/microbiolspec.BAI-0018-2019.

- 888 10. Pietri JE, DeBruhl H, Sullivan W. 2016. The rich somatic life of *Wolbachia*.  
889 Microbiologyopen. 5(6):923-936. doi: 10.1002/mbo3.390.
- 890 11. Chrostek E, Pelz-Stelinski K, Hurst GDD, Hughes GL. 2017. Horizontal Transmission of  
891 Intracellular Insect Symbionts via Plants. Front Microbiol. 8:2237. doi:  
892 10.3389/fmicb.2017.02237.
- 893 12. Serbus LR, Casper-Lindley C, Landmann F, Sullivan W. 2008. The genetics and cell  
894 biology of *Wolbachia*-host interactions. Annu Rev Genet. 42:683-707. doi:  
895 10.1146/annurev.genet.41.110306.130354.
- 896 13. Zug R, Hammerstein P. 2015. Bad guys turned nice? A critical assessment of *Wolbachia*  
897 mutualisms in arthropod hosts. Biol Rev Camb Philos Soc. 90(1):89-111. doi:  
898 10.1111/brv.12098.
- 899 14. Chrostek E, Marialva MS, Esteves SS, Weinert LA, Martinez J, Jiggins FM, Teixeira L.  
900 2013. *Wolbachia* variants induce differential protection to viruses in *Drosophila*  
901 *melanogaster*: a phenotypic and phylogenomic analysis. PLoS Genet. 9(12):e1003896.  
902 doi: 10.1371/journal.pgen.1003896.
- 903 15. Martinez J, Longdon B, Bauer S, Chan YS, Miller WJ, Bourtzis K, Teixeira L, Jiggins FM.  
904 2014. Symbionts commonly provide broad spectrum resistance to viruses in insects: a  
905 comparative analysis of *Wolbachia* strains. PLoS Pathog. 10(9):e1004369. doi:  
906 10.1371/journal.ppat.1004369.
- 907 16. López-Madrugal S, Duarte EH. 2019. Titer regulation in arthropod-*Wolbachia* symbioses.  
908 FEMS Microbiol Lett. 366(23):fnz232. doi: 10.1093/femsle/fnz232.
- 909 17. Ross PA, Turelli M, Hoffmann AA. 2019. Evolutionary Ecology of *Wolbachia* Releases for  
910 Disease Control. Annu Rev Genet. 53:93-116. doi: 10.1146/annurev-genet-112618-  
911 043609.
- 912 18. Miller WJ, Riegler M. 2006. Evolutionary dynamics of *wAu*-like *Wolbachia* variants in  
913 neotropical *Drosophila* spp. Appl Environ Microbiol. 72(1):826-35. doi:

- 914 10.1128/AEM.72.1.826-835.2006.
- 915 19. Strunov A, Schneider DI, Albertson R, Miller WJ. 2017. Restricted distribution and  
916 lateralization of mutualistic *Wolbachia* in the *Drosophila* brain. *Cell Microbiol.* 19(1). doi:  
917 10.1111/cmi.12639.
- 918 20. Albertson R, Tan V, Leads RR, Reyes M, Sullivan W, Casper-Lindley C. 2013. Mapping  
919 *Wolbachia* distributions in the adult *Drosophila* brain. *Cell Microbiol*, 15, 1527–1544. doi:  
920 10.1111/cmi.12136.
- 921 21. Homem CC, Knoblich JA. 2012. *Drosophila* neuroblasts: a model for stem cell biology.  
922 *Development.* 139(23):4297-310. doi: 10.1242/dev.080515.
- 923 22. Kirilly D, Xie T. 2007. The *Drosophila* ovary: an active stem cell community. *Cell Res.*  
924 17(1):15-25. doi: 10.1038/sj.cr.7310123.
- 925 23. Gustafson EA, Wessel GM. 2010. *Vasa* genes: emerging roles in the germ line and in  
926 multipotent cells. *Bioessays.* 32(7):626-37. doi: 10.1002/bies.201000001.
- 927 24. Voronin D, Cook, DA, Steven A, Taylor MJ. 2012. Autophagy  
928 regulates *Wolbachia* populations across diverse symbiotic associations. *Proc Natl Acad*  
929 *Sci USA* 109: E1638– E1646. doi: 10.1073/pnas.1203519109.
- 930 25. Deehan M, Lin W, Blum B, Emili A, Frydman H. Intracellular Density of *Wolbachia* Is  
931 Mediated by Host Autophagy and the Bacterial Cytoplasmic Incompatibility Gene *cifB* in a  
932 Cell Type-Dependent Manner in *Drosophila melanogaster*. *mBio.* 2021 Jan  
933 12;12(1):e02205-20. doi: 10.1128/mBio.02205-20.
- 934 26. Bolte S, Cordelières FP. 2006. A guided tour into subcellular colocalization analysis in light  
935 microscopy. *J Microsc.* 224(Pt 3):213-32. doi: 10.1111/j.1365-2818.2006.01706.x.
- 936 27. Schindelin J, Arganda-Carreras I, Frise E, Kaynig V, Longair M, Pietzsch T, Preibisch S,  
937 Rueden C, Saalfeld S, Schmid B, Tinevez JY, White DJ, Hartenstein V, Eliceiri K,  
938 Tomancak P, Cardona A. 2012. Fiji: an open-source platform for biological-image analysis.  
939 *Nat Methods.* 9(7):676-82. doi: 10.1038/nmeth.2019.

- 940 28. Strunov A, Kiseleva E. 2016. *Drosophila melanogaster* brain invasion: Pathogenic  
941 *Wolbachia* in central nervous system of the fly. *Insect Sci.* 23, 253–264. doi: 10.1111/1744-  
942 7917.12187.
- 943 29. Bayraktar OA, Boone JQ, Drummond ML, Doe CQ. 2010. *Drosophila* type  
944 II neuroblast lineages keep Prospero levels low to generate large clones that contribute to  
945 the adult brain central complex. *Neural Dev.* 5:26. doi: 10.1186/1749-8104-5-26.
- 946 30. Riegler M, Iturbe-Ormaetxe I, Woolfit M, Miller WJ, O'Neill SL. 2012. Tandem repeat  
947 markers as novel diagnostic tools for high resolution fingerprinting of *Wolbachia*. *BMC*  
948 *Microbiol.* 12 Suppl 1(Suppl 1):S12. doi: 10.1186/1471-2180-12-S1-S12.
- 949 31. Martinez J, Klasson L, Welch JJ, Jiggins FM. 2021. Life and Death of Selfish Genes:  
950 Comparative Genomics Reveals the Dynamic Evolution of Cytoplasmic Incompatibility.  
951 *Mol Biol Evol.* 38(1):2-15. doi: 10.1093/molbev/msaa209.
- 952 32. Madi-Ravazzi L. M., Zorzato S. V., Strunov A., Roman B. E., Yassim A., Hua-Van A.;  
953 Miller W. J. 2021. Integrative taxonomy and a new species description in the sturtevantii  
954 subgroup of the *Drosophila saltans* group (Diptera: Drosophilidae). *Zootaxa – in press.*
- 955 33. Lassy CW, Karr TL. 1996. Cytological analysis of fertilization and early embryonic  
956 development in incompatible crosses of *Drosophila simulans*. *Mech. Dev.*, 57, pp. 47-58.  
957 doi: 10.1016/0925-4773(96)00527-8.
- 958 34. Arthofer W, Markus R, Dimitrios A, Christian S. 2009. Evidence for low-titre infections in  
959 insect symbiosis: *Wolbachia* in the bark beetle *Pityogenes chalcographus* (Coleoptera,  
960 Scolytinae). *Environ Microbiol.* 11(8):1923-33. doi: 10.1111/j.1462-2920.2009.01914.x.
- 961 35. Schneider DI, Klasson L, Lind AE, Miller WJ. 2014. More than fishing in the dark: PCR of  
962 a dispersed sequence produces simple but ultrasensitive *Wolbachia* detection. *BMC*  
963 *Microbiol.* 14:121. doi: 10.1186/1471-2180-14-121.
- 964 36. Baião GC, Schneider DI, Miller WJ, Klasson L. 2019. The effect of *Wolbachia* on gene

- 965 expression in *Drosophila paulistorum* and its implications for symbiont-induced host  
966 speciation. BMC Genomics. 20(1):465. doi: 10.1186/s12864-019-5816-9.
- 967 37. Strunov A, Kiseleva E, Gottlieb Y. 2013. Spatial and temporal distribution of pathogenic  
968 *Wolbachia* strain wMelPop in *Drosophila melanogaster* central nervous system under  
969 different temperature conditions. J Invertebr Pathol, 114, 22–30. doi:  
970 10.1016/j.jip.2013.05.001.
- 971 38. Veneti Z, Clark ME, Karr TL, Savakis C, Bourtzis K. 2004. Heads or tails: host-parasite  
972 interactions in the *Drosophila-Wolbachia* system. Appl Environ Microbiol. 70(9):5366-72.  
973 doi: 10.1128/AEM.70.9.5366-5372.2004.
- 974 39. Serbus LR, Sullivan W. 2007. A cellular basis for *Wolbachia* recruitment to the host  
975 germline. PLoS Pathog. 3(12):e190. doi: 10.1371/journal.ppat.0030190.
- 976 40. Toomey ME, Panaram K, Fast EM, Beatty C, Frydman HM. 2013. Evolutionarily  
977 conserved *Wolbachia*-encoded factors control pattern of stem-cell niche tropism in  
978 *Drosophila* ovaries and favor infection. Proc Natl Acad Sci U S A. 110(26):10788-93. doi:  
979 10.1073/pnas.1301524110.
- 980 41. Toomey ME, Frydman HM. 2014. Extreme divergence of *Wolbachia* tropism for the stem-  
981 cell-niche in the *Drosophila* testis. PLoS Pathog. 10(12):e1004577. doi:  
982 10.1371/journal.ppat.1004577.
- 983 42. Tadros W, Lipshitz HD. 2009. The maternal-to-zygotic transition: a play in two acts.  
984 Development. 136(18):3033-42. doi: 10.1242/dev.033183.
- 985 43. Weissman AM. 2001. Themes and variations on ubiquitylation. Nat Rev Mol Cell Biol.  
986 2(3):169-78. doi: 10.1038/35056563.
- 987 44. Fujita N, Yoshimori T. 2011. Ubiquitination-mediated autophagy against invading bacteria.  
988 Curr Opin Cell Biol. 23(4):492-7. doi: 10.1016/j.ceb.2011.03.003.
- 989 45. Khaminets A, Behl C, Dikic I. 2016. Ubiquitin-Dependent and Independent Signals In  
990 Selective Autophagy. Trends Cell Biol. 26(1):6-16. doi: 10.1016/j.tcb.2015.08.010.

- 991 46. Meusser B, Hirsch C, Jarosch E, Sommer T. 2005. ERAD: the long road to destruction.  
992 Nat Cell Biol. 7(8):766-72. doi: 10.1038/ncb0805-766.
- 993 47. White PM, Serbus LR, Debec A, Codina A, Bray W, Guichet A, Lokey RS, Sullivan W.  
994 2017. Reliance of *Wolbachia* on High Rates of Host Proteolysis Revealed by a Genome-  
995 Wide RNAi Screen of *Drosophila* Cells. Genetics. 205(4):1473-1488. doi:  
996 10.1534/genetics.116.198903.
- 997 48. Celli J, Tsolis RM. 2015. Bacteria, the endoplasmic reticulum and the unfolded protein  
998 response: friends or foes? Nat Rev Microbiol. 2015 Feb;13(2):71-82. doi:  
999 10.1038/nrmicro3393.
- 1000 49. Voronin DA, Dudkina NV, Kiseleva EV. 2004. A new form of symbiotic  
1001 bacteria *Wolbachia* found in the endoplasmic reticulum of early embryos of *Drosophila*  
1002 *melanogaster*. Dokl Biol Sci. 396:227-9. doi: 10.1023/b:dobs.0000033284.76770.c1.
- 1003 50. Serbus LR, Ferreccio A, Zhukova M, McMorris CL, Kiseleva E, Sullivan W. 2011. A  
1004 feedback loop between *Wolbachia* and the *Drosophila* gurken mRNP complex  
1005 influences *Wolbachia* titer. J Cell Sci. 124(Pt 24):4299-308. doi: 10.1242/jcs.092510.
- 1006 51. Fattouh N, Cazevieville C, Landmann F. 2019. *Wolbachia* endosymbionts subvert the  
1007 endoplasmic reticulum to acquire host membranes without triggering ER stress. PLoS  
1008 Negl Trop Dis. 13(3):e0007218. doi: 10.1371/journal.pntd.0007218.
- 1009 52. Hayashi-Nishino M, Fujita N, Noda T, Yamaguchi A, Yoshimori T, Yamamoto A. 2009. A  
1010 subdomain of the endoplasmic reticulum forms a cradle for autophagosome formation.  
1011 Nat Cell Biol. 11(12):1433-7. doi: 10.1038/ncb1991.
- 1012 53. Simonet P, Gaget K, Balmand S, Ribeiro Lopes M, Parisot N, Buhler K, Duport G,  
1013 Vulsteke V, Febvay G, Heddi A, Charles H, Callaerts P, Calevro F. 2018. Bacteriocyte cell  
1014 death in the pea aphid/*Buchnera* symbiotic system. Proc Natl Acad Sci U S A.  
1015 115(8):E1819-E1828. doi: 10.1073/pnas.1720237115.
- 1016 54. Zachari M, Gudmundsson SR, Li Z, Manifava M, Shah R, Smith M, Stronge J, Karanasios

- 1017 E, Piunti C, Kishi-Itakura C, Vihinen H, Jokitalo E, Guan JL, Buss F, Smith AM, Walker SA,  
1018 Eskelinen EL, Ktistakis NT. 2019. Selective Autophagy of Mitochondria on a Ubiquitin-  
1019 Endoplasmic-Reticulum Platform. *Dev Cell*. 50(5):627-643.e5. doi:  
1020 10.1016/j.devcel.2019.06.016.
- 1021 55. Huang J, Brumell JH. 2014. Bacteria-autophagy interplay: a battle for survival. *Nat Rev*  
1022 *Microbiol*. 12(2):101-14. doi: 10.1038/nrmicro3160.
- 1023 56. Le Clec'h W, Braquart-Varnier C, Raimond M, Ferdy J.-B, Bouchon D, Sicard M. 2012.  
1024 High virulence of *Wolbachia* after host switching: When autophagy hurts. *PLoS Pathog*, 8,  
1025 e1002844. doi: 10.1371/journal.ppat.1002844.
- 1026 57. Kimmey JM, Stallings CL. 2016. Bacterial Pathogens versus Autophagy: Implications for  
1027 Therapeutic Interventions. *Trends Mol Med*. 22(12):1060-1076. doi:  
1028 10.1016/j.molmed.2016.10.008.
- 1029 58. Wu YW, Li F. 2019. Bacterial interaction with host autophagy. *Virulence*. 10(1):352-362.  
1030 doi: 10.1080/21505594.2019.1602020.
- 1031 59. Kremer N, Charif D, Henri H, Gavory F, Wincker P, Mavingui P, Vavre F. 2012. Influence of  
1032 *Wolbachia* on host gene expression in an obligatory symbiosis. *BMC Microbiol*. 12 Suppl  
1033 1(Suppl 1):S7. doi: 10.1186/1471-2180-12-S1-S7.
- 1034 60. Chevalier F, Herbinière-Gaboreau J, Charif D, Mitta G, Gavory F, Wincker P, Grève P,  
1035 Braquart-Varnier C, Bouchon D. 2012. Feminizing *Wolbachia*: a transcriptomics approach  
1036 with insights on the immune response genes in *Armadillidium vulgare*. *BMC Microbiol*. 12  
1037 Suppl 1(Suppl 1):S1. doi: 10.1186/1471-2180-12-S1-S1.
- 1038 61. Cinalli RM, Rangan P, Lehmann R. 2008. Germ cells are forever. *Cell*. 132(4):559-62. doi:  
1039 10.1016/j.cell.2008.02.003.
- 1040 62. Van Doren M, Broihier HT, Moore LA, Lehmann R. 1998. HMG-CoA reductase guides  
1041 migrating primordial germ cells. *Nature*. 396(6710):466-9. doi: 10.1038/24871.
- 1042 63. Wright JD, Barr AR. 1980. The ultrastructure and symbiotic relationships of *Wolbachia* of

- 1043 mosquitoes of the *Aedes scutellaris* group. *J Ultrastruct Res.* 72(1):52-64. doi:  
1044 10.1016/s0022-5320(80)90135-5.
- 1045 64. Zhukova MV, Kiseleva E. 2012. The virulent *Wolbachia* strain wMelpop increases the  
1046 frequency of apoptosis in the female germline cells of *Drosophila melanogaster*. *BMC*  
1047 *Microbiol.* 12, S15. doi: 10.1186/1471-2180-12-S1-S15.
- 1048 65. Ding WX, Li M, Biazik JM, Morgan DG, Guo F, Ni HM, Goheen M, Eskelinen EL, Yin XM.  
1049 2012. Electron microscopic analysis of a spherical mitochondrial structure. *J Biol Chem.*  
1050 287(50):42373-8. doi: 10.1074/jbc.M112.413674.
- 1051 66. Gautam M, Xie EF, Kocak N, Ozdinler PH. 2019. Mitoautophagy: A Unique Self-  
1052 Destructive Path Mitochondria of Upper Motor Neurons With TDP-43 Pathology Take,  
1053 Very Early in ALS. *Front Cell Neurosci.* 13:489. doi: 10.3389/fncel.2019.00489.
- 1054 67. Parra-Vega V, Corral-Martínez P, Rivas-Sendra A, Seguí-Simarro JM. 2015. Formation  
1055 and excretion of autophagic plastids (plastolysomes) in *Brassica napus* embryogenic  
1056 microspores. *Front Plant Sci.* 6:94. doi: 10.3389/fpls.2015.00094.
- 1057 68. Rothwell WF, Sullivan W. 2007. Fixation of *Drosophila* embryos. *CSH Protoc.*  
1058 2007:pdb.prot4827. doi: 10.1101/pdb.prot4827.
- 1059 69. Heddi A, Grenier AM, Khatchadourian C, Charles H, Nardon P. 1999. Four intracellular  
1060 genomes direct weevil biology: nuclear, mitochondrial, principal endosymbiont, and  
1061 *Wolbachia*. *Proc Natl Acad Sci U S A.* 96(12):6814-9. doi: 10.1073/pnas.96.12.6814.
- 1062 70. Eroglu E, Burkard TR, Jiang Y, Saini N, Homem CCF, Reichert H, Knoblich JA. 2014.  
1063 SWI/SNF complex prevents lineage reversion and induces temporal patterning in neural  
1064 stem cells. *Cell.* 156(6):1259-1273. doi: 10.1016/j.cell.2014.01.053.
- 1065 71. R-Core-Team. R: A Language and Environment for Statistical Computing. Vienna, Austria:  
1066 R Foundation for Statistical computing; 2015.
- 1067



1068 **Supplemental Figures**

1069

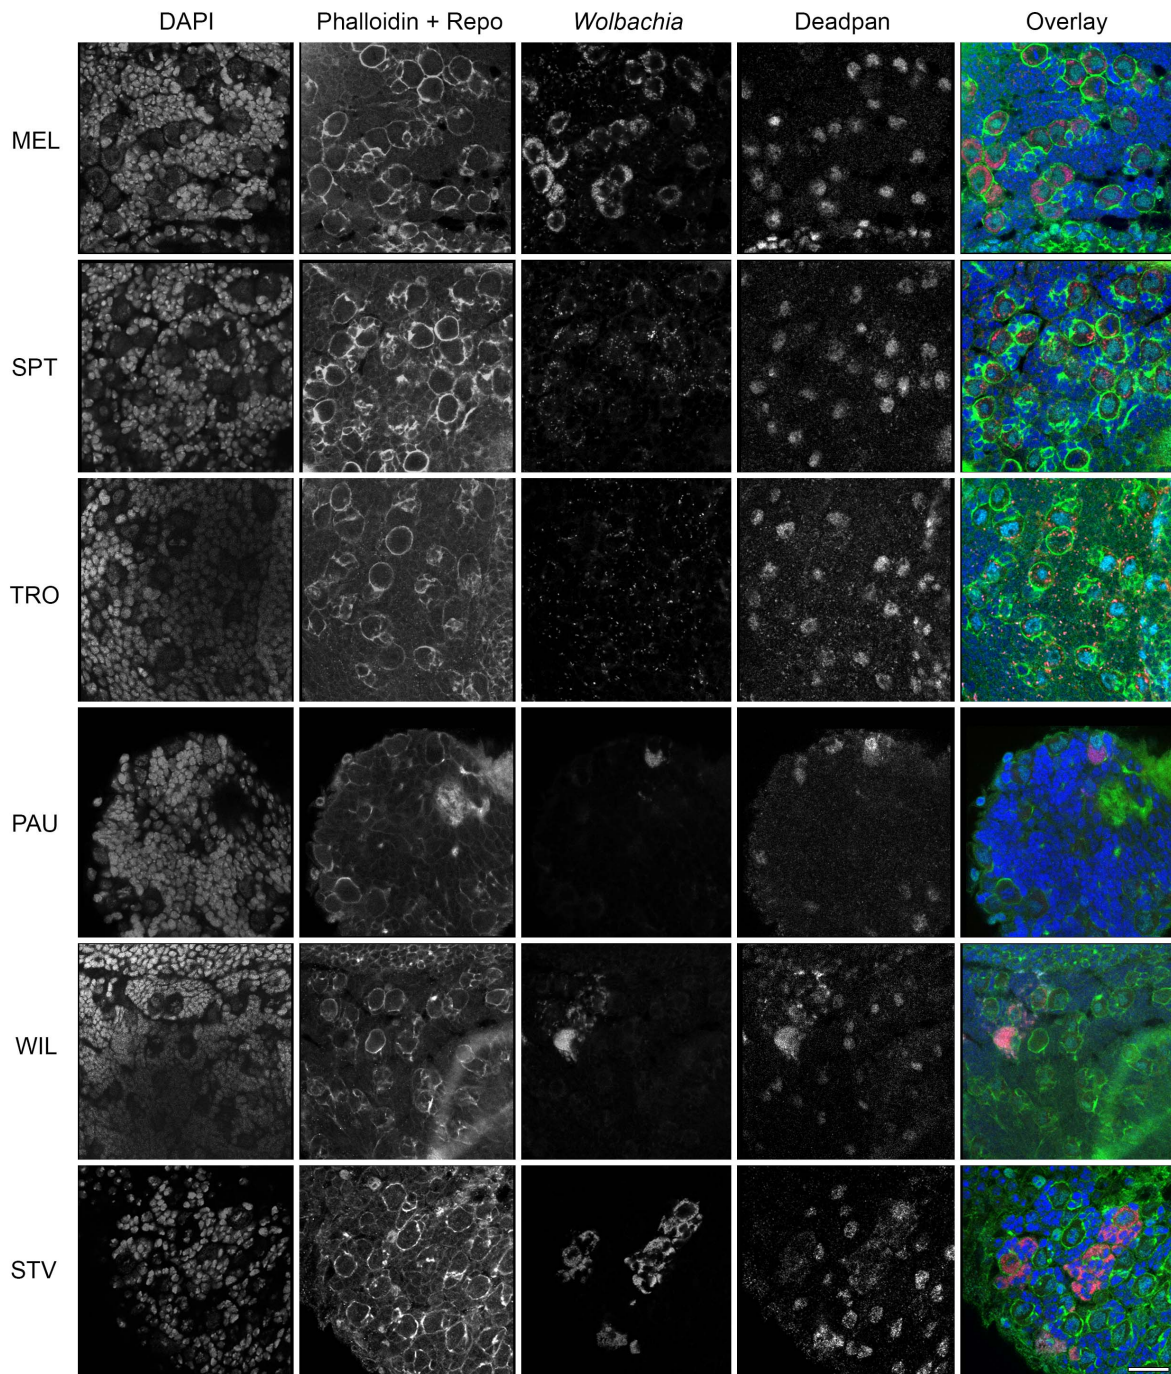

1070

1071 **Figure S1. *Wolbachia* infection in neuroblasts of the CNS of 3<sup>rd</sup> instar *Drosophila* larvae.**  
1072 Sequential RNA-FISH using *Wolbachia*-specific 16S rRNA probe (red) followed by  
1073 immunofluorescent staining with anti-Repo (glial cells, green) and anti-Deadpan (neuroblasts,  
1074 cyan) antibodies of 3<sup>rd</sup> instar larval CNS. DNA is stained with DAPI (blue), and actin with Phalloidin  
1075 (green). For each *Drosophila* species 10 organs were analyzed. Scale bar: 20  $\mu$ m.

1076

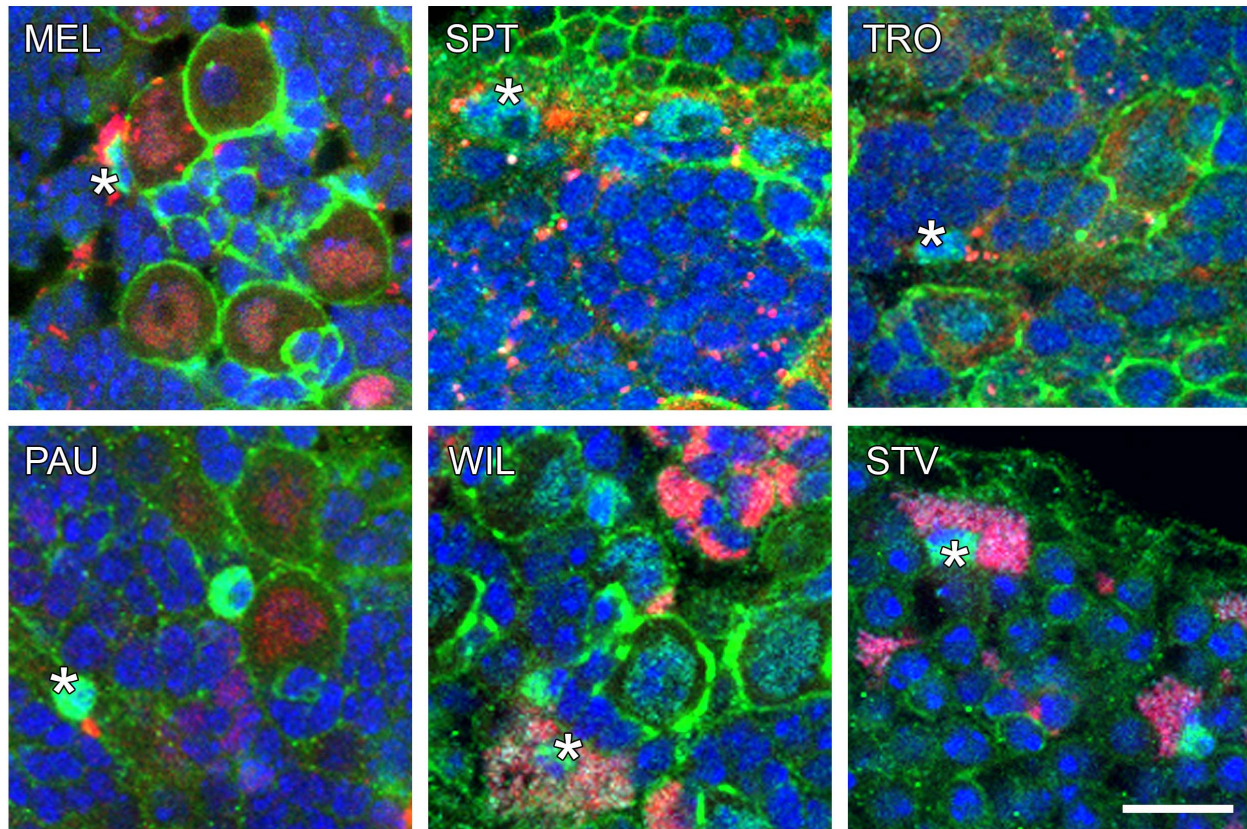

1077

1078 Figure S2. ***Wolbachia* infection of glial cells in the CNS of 3<sup>rd</sup> instar *Drosophila* larvae.**  
1079 Sequential FISH using *Wolbachia*-specific 16S rRNA probe (red) followed by immunofluorescent  
1080 staining with anti-Repo (glial cells, green) and anti-Deadpan (neuroblasts, cyan). DNA is stained  
1081 with DAPI (blue), and actin with Phalloidin (green). Asterisks indicate a glial cell infected with  
1082 *Wolbachia*. For each *Drosophila* species 10 organs were analyzed. Scale bar: 10  $\mu$ m.  
1083

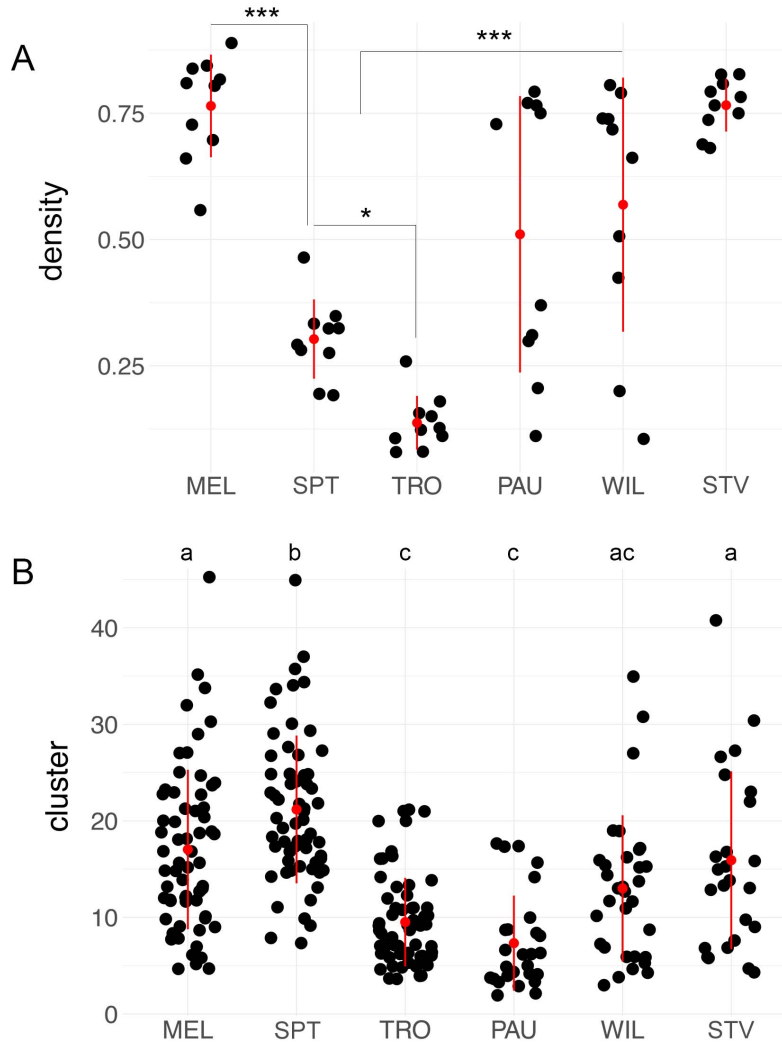

1084

1085 **Figure S3. Density and cluster aggregation of *Wolbachia* in the CNS of 3<sup>rd</sup> instar *Drosophila***  
1086 **larvae. (A)** Density within 10 neuroblasts of 3 individual brains was quantified with Fiji as a  
1087 bacterial load area divided by an area of cell cytoplasm. **(B)** Aggregation of infection in the larval  
1088 CNS of six *Drosophila* species was analyzed from bacterial clusters in 5 individual brains (61-65  
1089 clusters for SIT and 26-32 clusters for RIT) by quantifying the number of neighboring infected  
1090 neurons in groups. In **A** asterisks denote statistical significance (\*,  $p < 0.05$ ; \*\*\*,  $p < 0.001$ ; One-way  
1091 ANOVA with Tukey HSD Test). In **B** statistical significance is shown with letters ( $p < 0.05$ , One-way  
1092 ANOVA with Tukey HSD Test). Red bars show standard deviation, red dots designate the mean  
1093 value. For more details, see Supplemental data file.  
1094

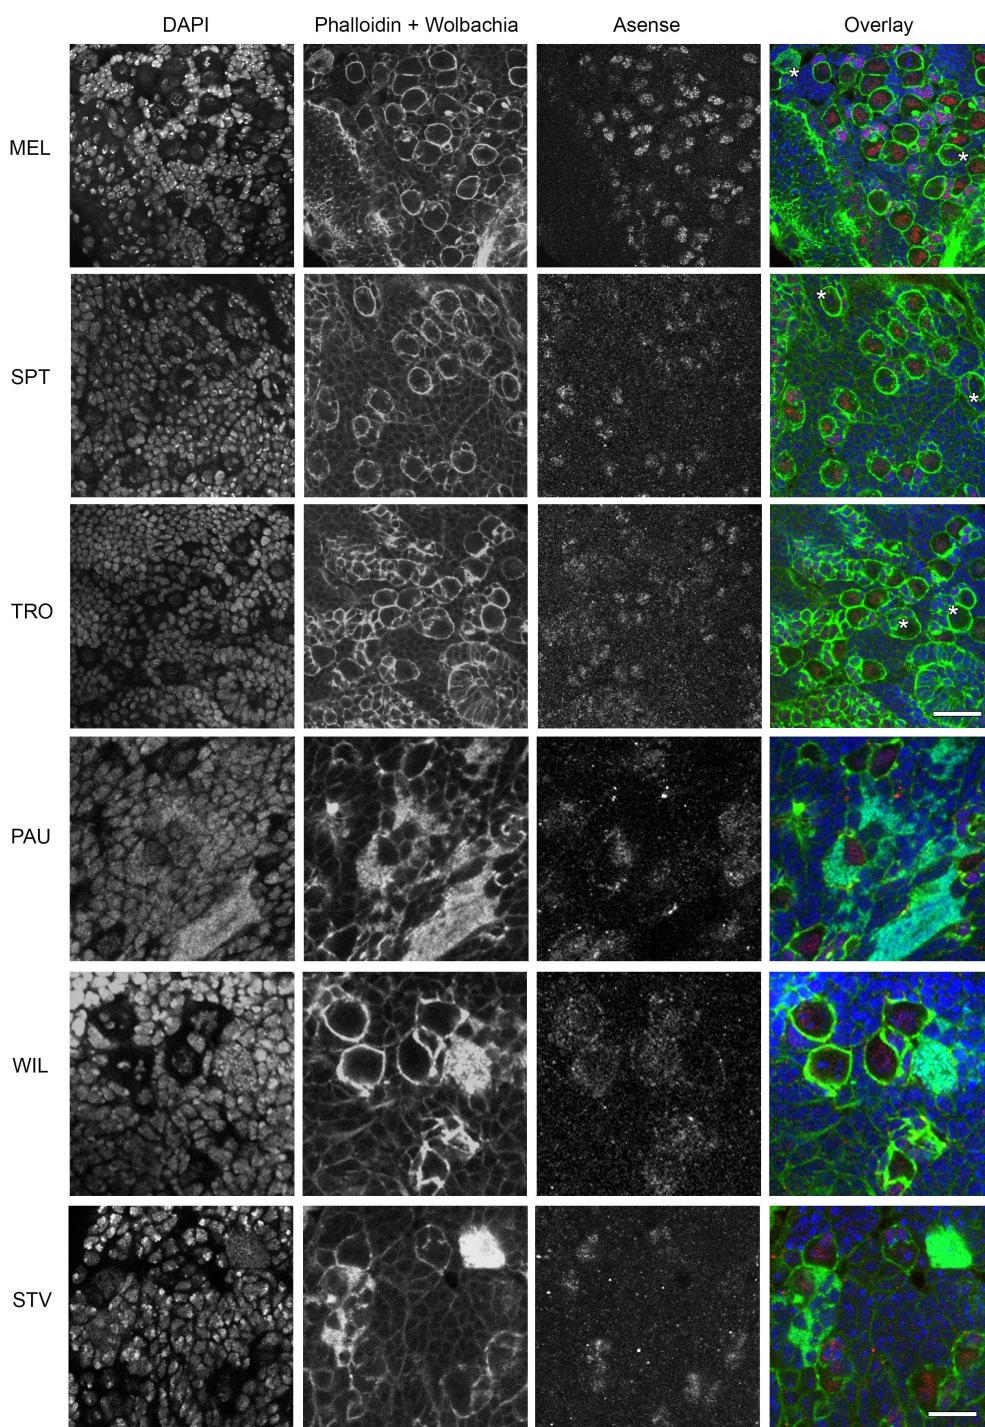

1095

1096 Figure S4. *Wolbachia* infection in type I and II neuroblasts in the CNS of 3<sup>rd</sup> instar  
1097 *Drosophila* larvae. Sequential FISH using *Wolbachia*-specific 16S rRNA probe (green dots) and  
1098 immunofluorescent staining with anti-Asense antibody (red), which is diagnostic for Type I  
1099 neuroblasts, of 3<sup>rd</sup> instar larval CNS. DNA is stained with DAPI (blue), actin with Phalloidin (green).  
1100 Asterisks depict type II neuroblasts, which are Asense-negative, infected with *Wolbachia* (green  
1101 dots). In total 10 brains were analyzed for each species. Scale bar: 20  $\mu$ m (MEL, SPT, TRO), 10  
1102  $\mu$ m (PAU, WIL, STV).

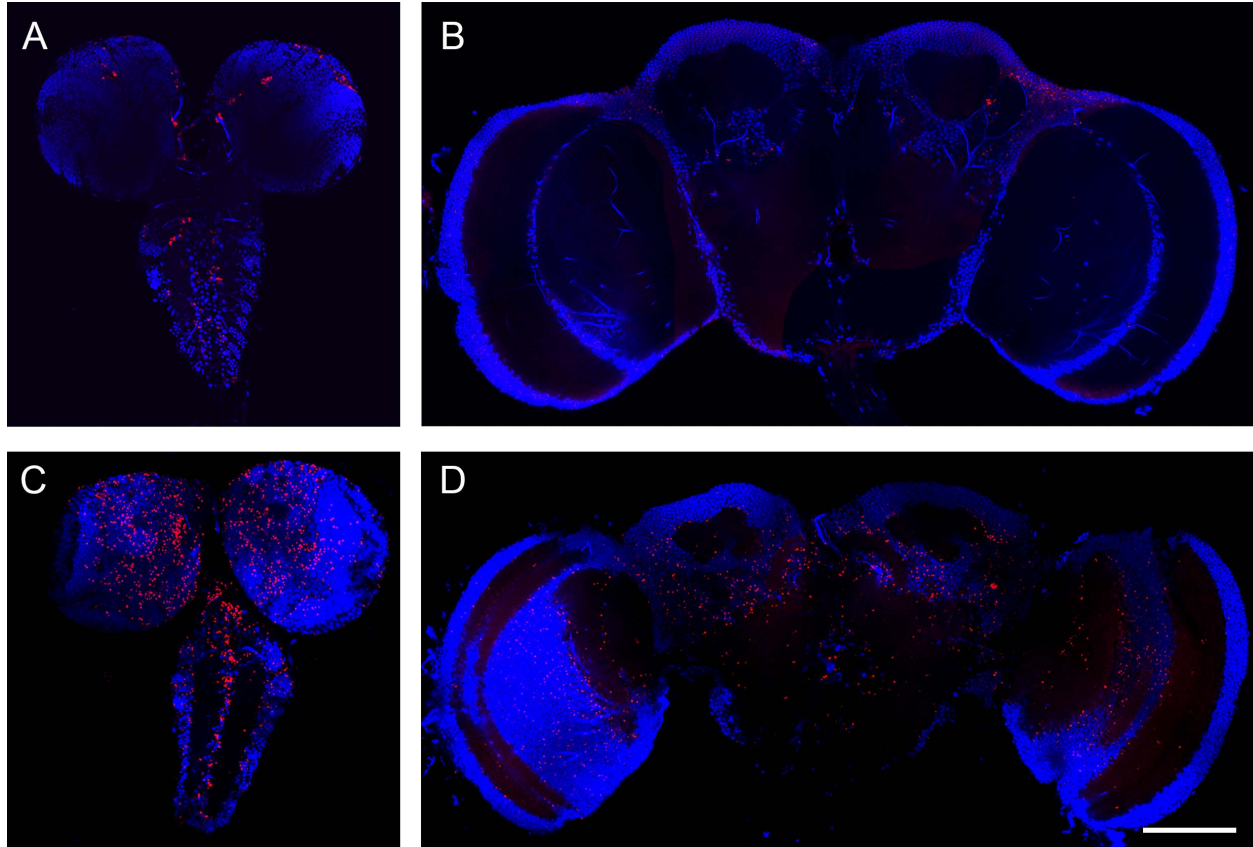

1103

1104 Figure S5. *Wolbachia* infection in nervous tissues of *Drosophila lehrmanae* (A, B) from  
1105 **sturtevanti** subgroup and *Drosophila prosaltans* (C, D) from saltans subgroup. Fluorescent  
1106 *in situ* hybridization on 3<sup>rd</sup> instar larval CNS (A, C) and adult brains (B, D) using 16S rRNA  
1107 *Wolbachia*-specific probe (red). DNA is stained with DAPI (blue). Note restriction of *Wolbachia* in  
1108 *D. lehrmanae* and systemic infection in *D. prosaltans*. Scale bar: 50  $\mu$ m.

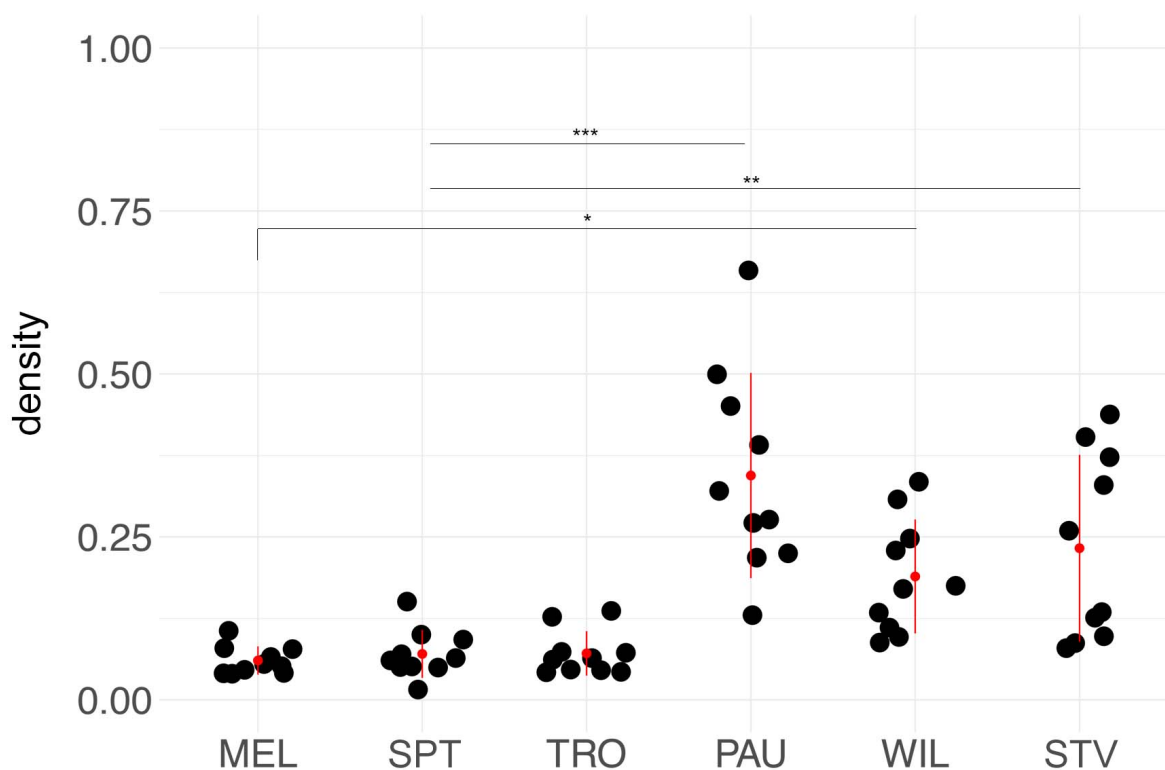

1109

1110 Figure S6. *Wolbachia* densities in the nurse cells of stage 3-5 ovaries of neotropical  
1111 *Drosophila* species. The bacterial density was analyzed in all six *Drosophila* species with Fiji as  
1112 bacterial infection area in an egg chamber divided by an area of the chamber. Asterisks denote  
1113 statistical significance (\*,  $p < 0.05$ ; \*\*,  $p < 0.01$ ; \*\*\*,  $p < 0.001$ ). Red bars show standard deviation,  
1114 red dots designate the mean value. In total, ten egg chambers were analyzed for every species  
1115 (Supplemental data file).  
1116

## Anti-GABARAP

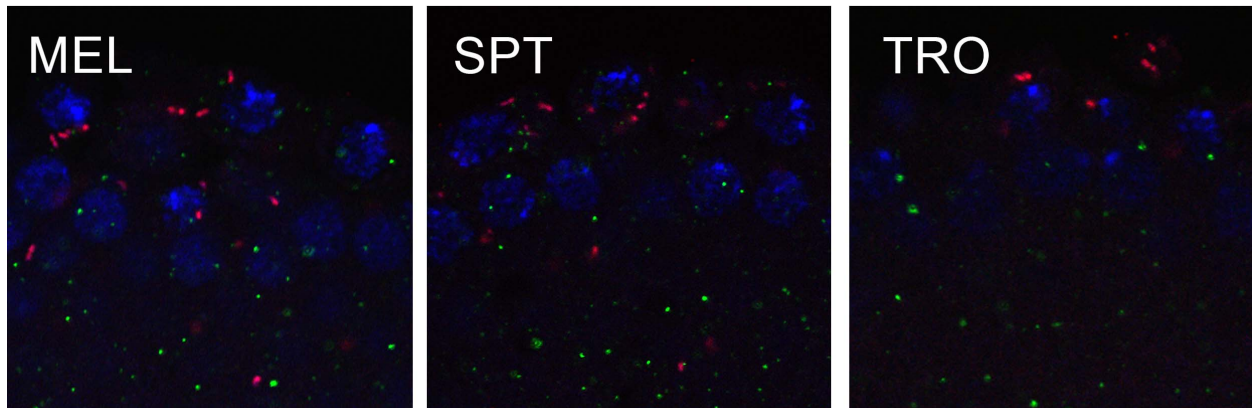

## Anti-FK2

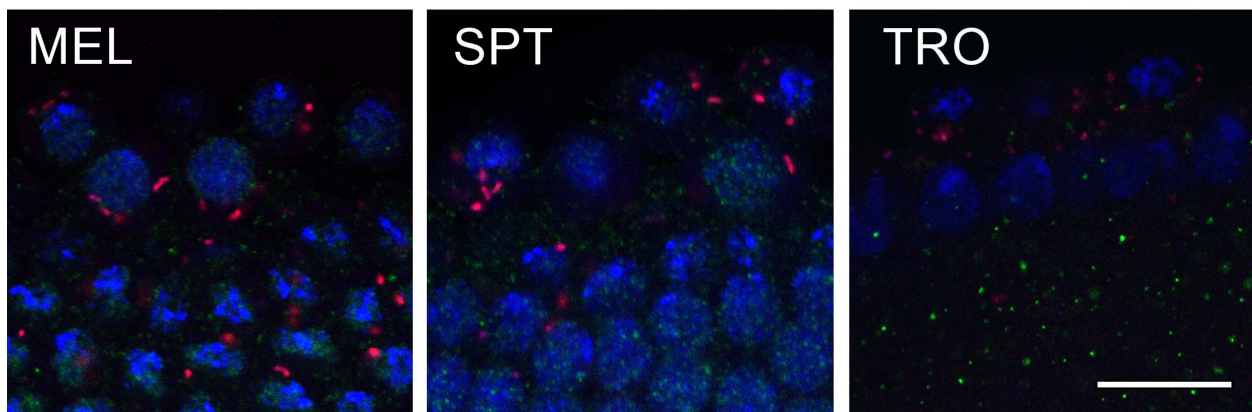

1117  
1118  
1119  
1120  
1121  
1122  
1123  
1124  
1125

Figure S7. **Absence of autophagy and ubiquitination of *Wolbachia* in primordial germ cells of *Drosophila* with SIT pattern of infection at stage 5 of embryogenesis.** Sequential FISH using *Wolbachia*-specific 16S rRNA probe (red) and immunofluorescent staining with the two autophagy-specific antibodies, i.e., anti-GABARAP (green, upper panel) and anti-FK2 (green, lower panel) on PGCs of embryos from the six species at the cellularization stage. DNA is stained with DAPI in blue. For each *Drosophila* species five embryos were analyzed. Scale bar: 20  $\mu$ m.

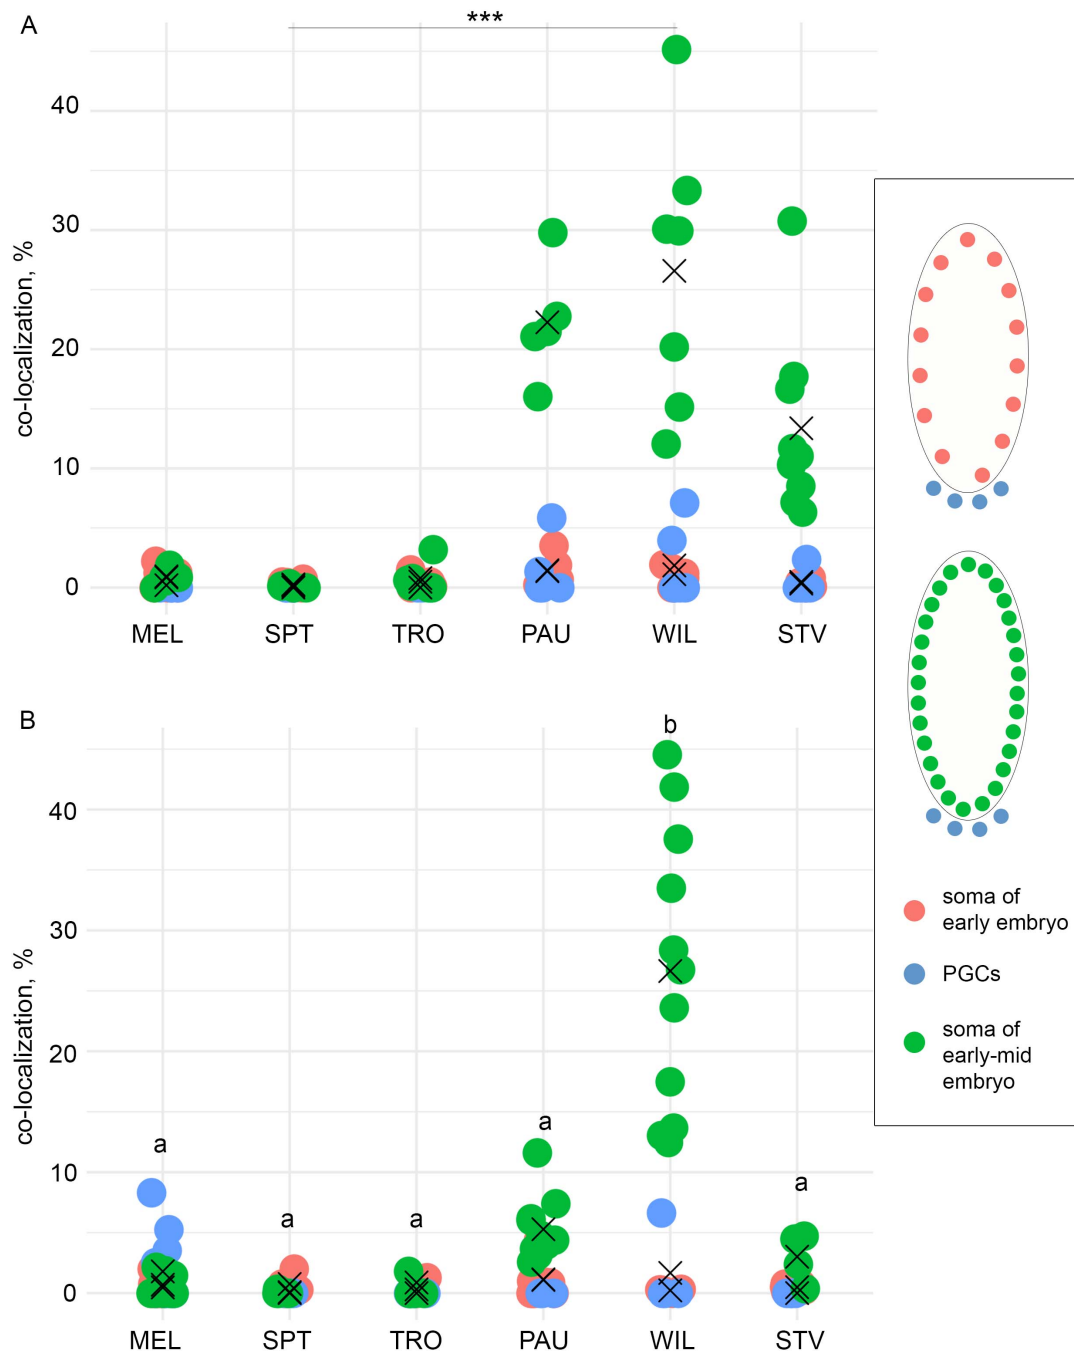

1126

1127 **Figure S8. *Wolbachia* co-localization with anti-GABARAP (A) and anti-FK2 (B) antibodies.**  
 1128 Co-localization was assessed using JACoP Fiji plugin. Each dot represents percentage of co-  
 1129 localization in a single embryo in the soma at stages 3-4 and stages 5-6 or PGCs of both (stages  
 1130 were fused due to the absence of differences). On **A** asterisks denote statistical significance only  
 1131 for soma of early-mid embryo at stages 5-6 (\*\*\*,  $p < 0.001$ ; One-way ANOVA with Tukey HSD Test).  
 1132 On **B** letters indicate statistical significance only for soma of early-mid embryo at stages 5-6  
 1133 ( $p < 0.001$ , One-way ANOVA with Tukey HSD Test). "X" symbol demonstrates the mean value. For  
 1134 every species and every stage 4-11 embryos were analyzed (Supplemental data file).



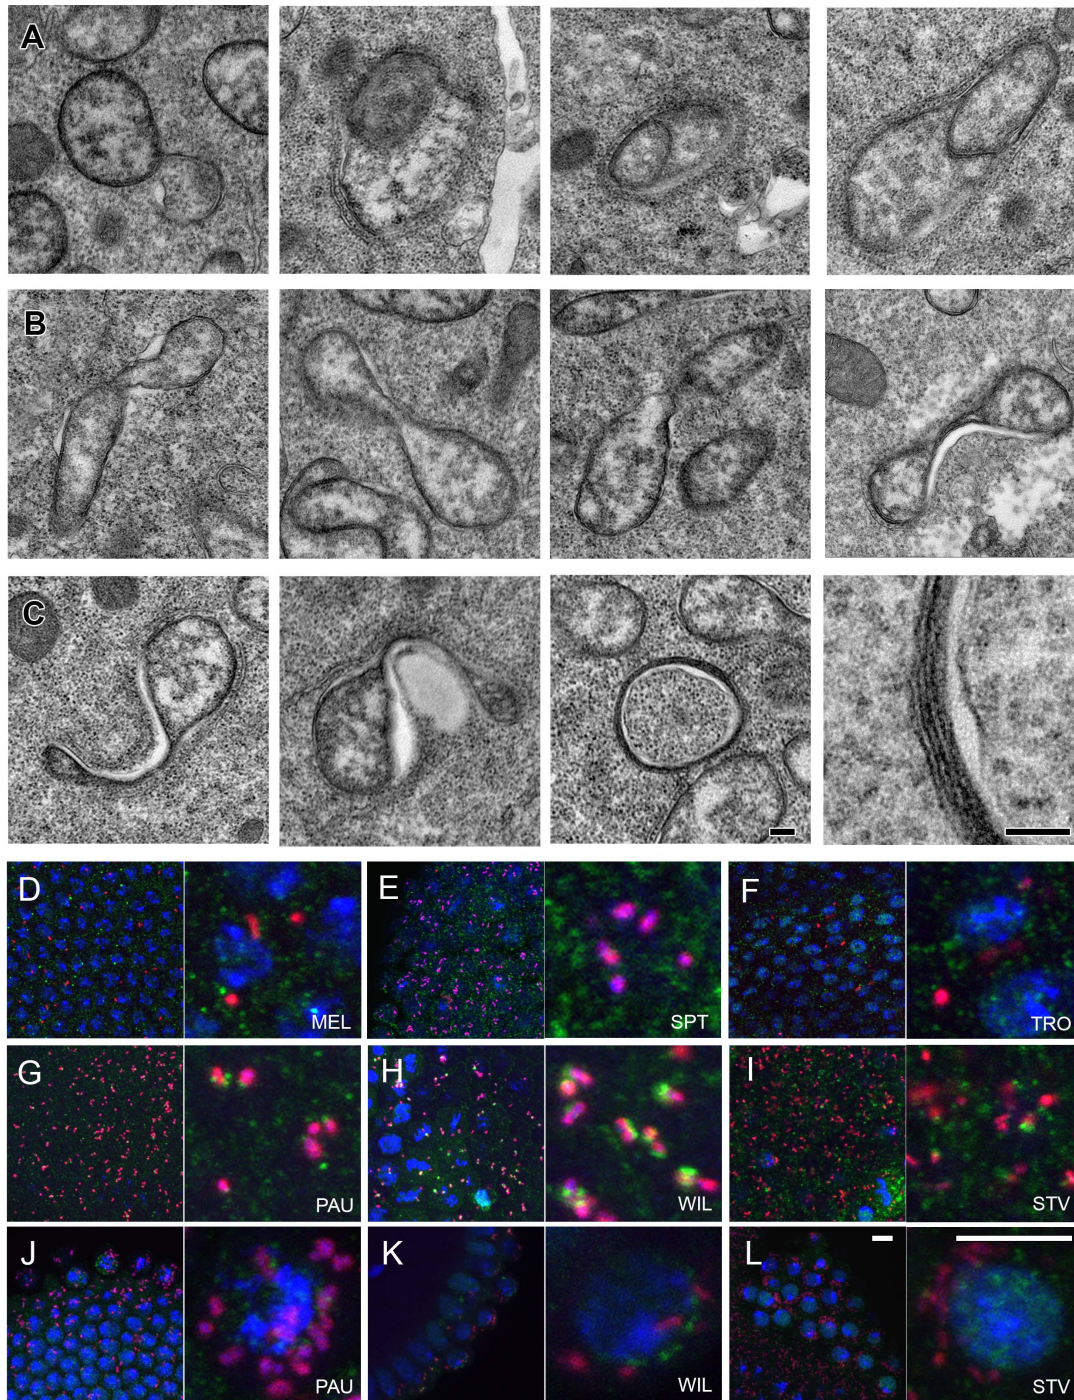

1135

1136 Figure S9. ***Wolbachia* interactions with the host cell.** Transmission electron microscopy  
1137 images of abnormal *Wolbachia* in early gastrulating PAU embryos in the soma (**A-C**)  
1138 demonstrating abnormalities in morphology like vesicle formation (**A**), stretching (**B**) and  
1139 membrane extrusions (**C**). Sequential FISH using *Wolbachia*-specific 16S rRNA probe (red) and  
1140 immunofluorescent staining with anti-FK2 (green) antibody (**D-L**). Note the absence of  
1141 ubiquitination in SIT species (**D-F**) and co-localization of anti-FK2 with *Wolbachia* in RIT species  
1142 (**G-I**). Also note the absence of co-localization of anti-FK2 with bacteria in PGCs of restricting  
1143 species (**J-L**). Scale bar: 0.1  $\mu\text{m}$  (**A-C**), 10  $\mu\text{m}$  (**D-L**).

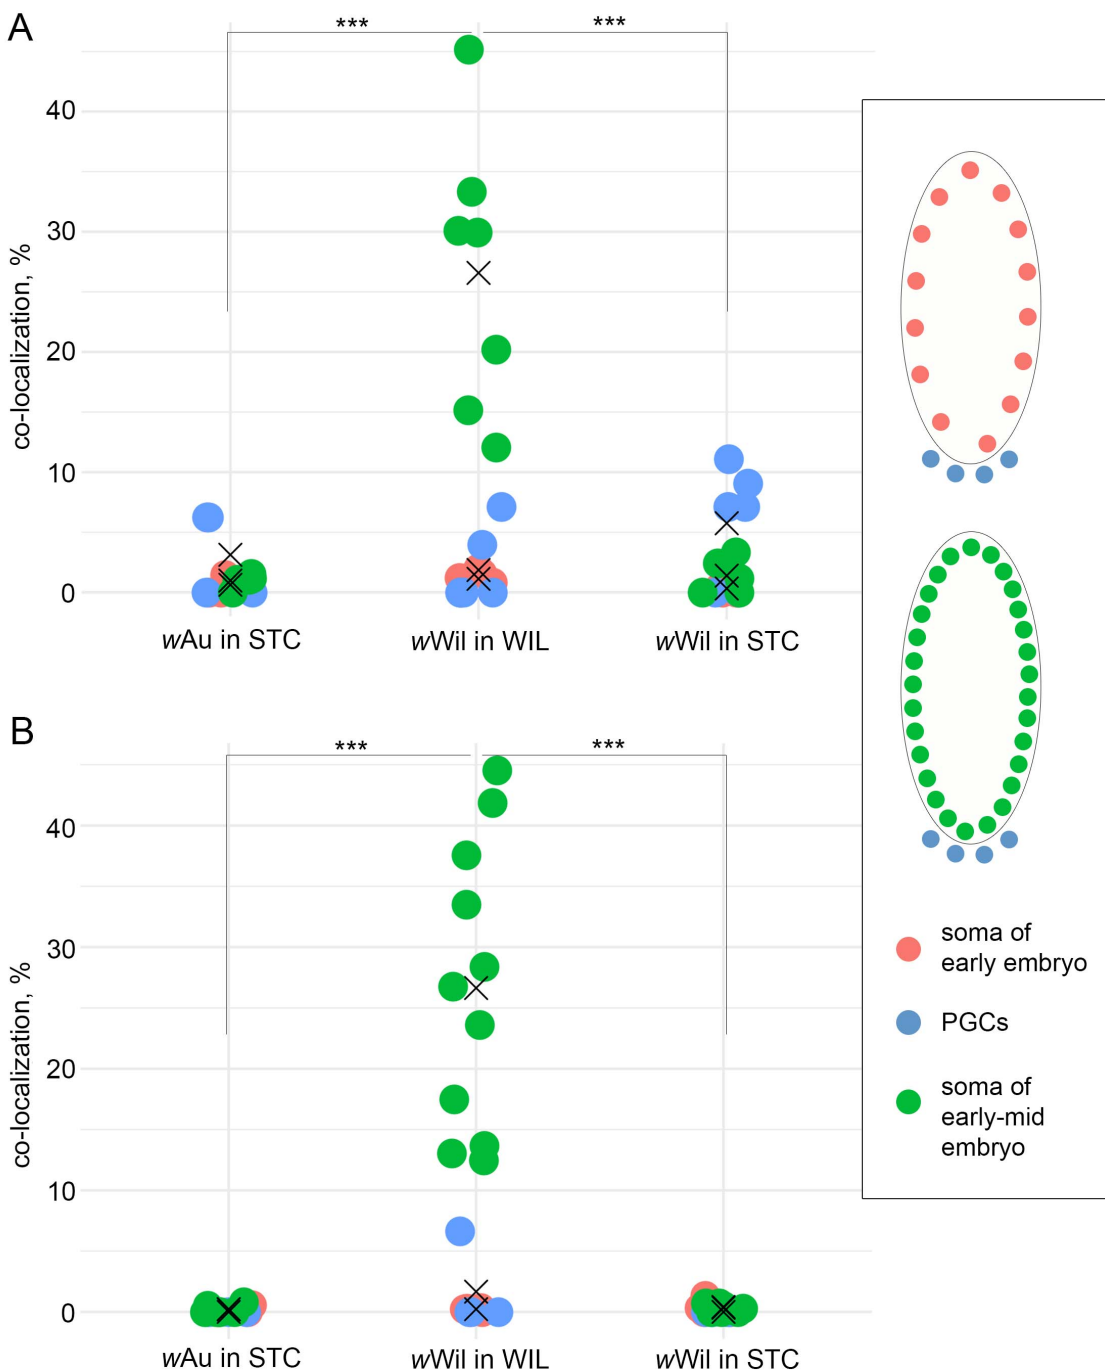

1144

1145 Figure S10. ***Wolbachia* co-localization with anti-GABARAP (A) and anti-FK2 (B) antibodies.**  
 1146 Co-localization was assessed using JACoP Fiji plugin. Each dot represents percentage of co-  
 1147 localization in a single embryo in the soma at stage 5 and stage 6 or PGCs at both stages (stages  
 1148 were fused due to the absence of differences). Asterisks denote statistical significance only for  
 1149 soma of early-mid embryo at stage 6 (\*\*\*,  $p < 0.001$ ; One-way ANOVA with Tukey HSD Test). "X"  
 1150 symbol demonstrates the mean value. For every species and every stage 4-11 embryos were  
 1151 analyzed (Supplemental data file).  
 1152

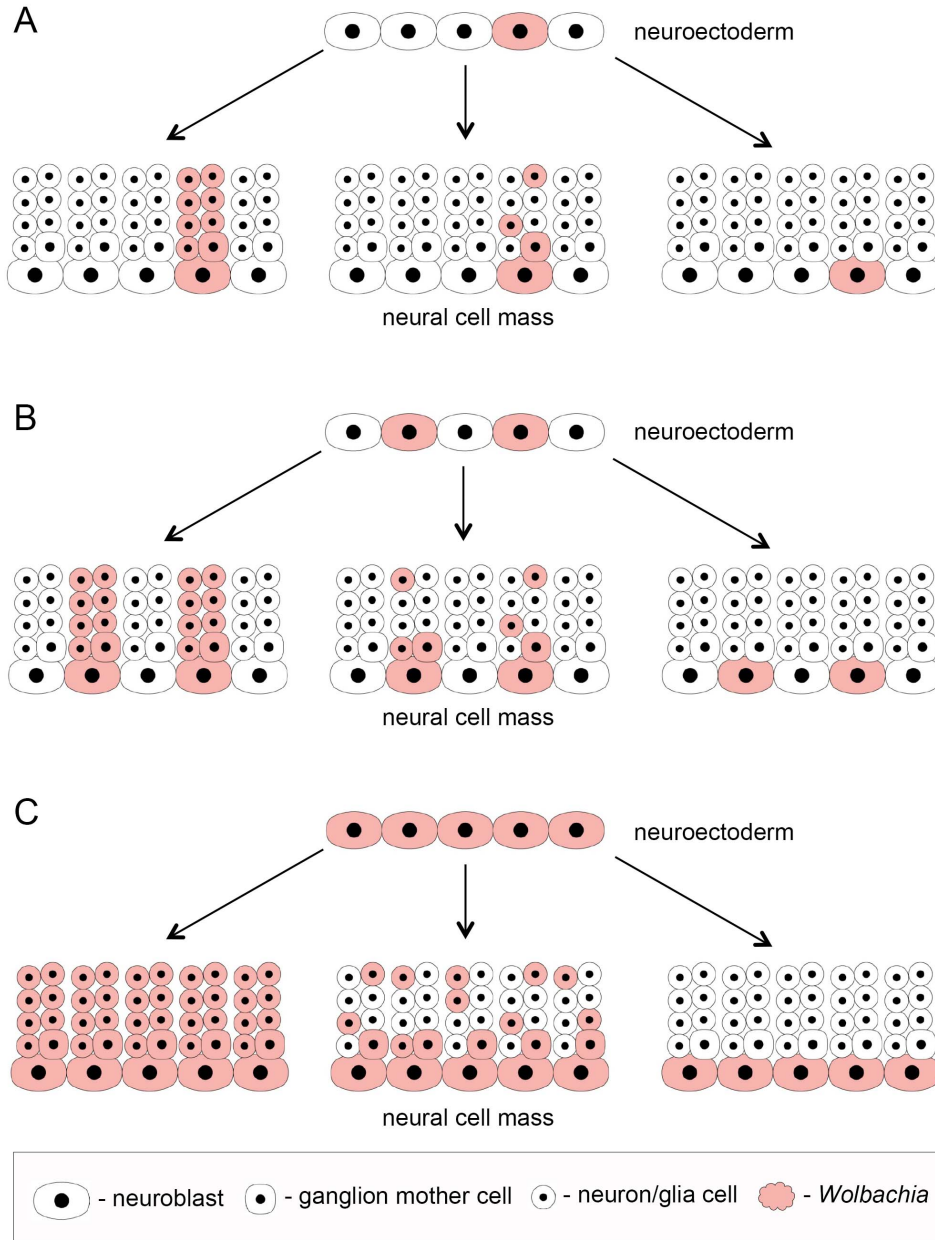

1153

1154 **Figure S11. Description of all possible variants of *Wolbachia* distribution patterns during**  
1155 **fly development exemplified on the central nervous system formation.** The scheme  
1156 demonstrates *Wolbachia* dissemination efficiency during mitosis of neuroblasts from the  
1157 neuroectoderm with different starting numbers of infected stem cells (niches) – low (A), moderate  
1158 (B) and high (C). Each neural cell mass picture demonstrates the percentage of cells in the  
1159 progeny of a single neuroblast receiving the infection.

1160

1161

1162

1163 Table S1. The role of bacterial and host factors in regulating the distribution and density of the  
1164 infection.

| references                | tissue             | tropism regulated by    | titer regulated by      |
|---------------------------|--------------------|-------------------------|-------------------------|
| Veneti et al., 2004       | ovaries and testes | <i>Wolbachia</i>        | host                    |
| Serbus and Sullivan, 2007 | ovaries            | <i>Wolbachia</i>        | host                    |
| Albertson et al., 2013    | CNS                | <i>Wolbachia</i>        | <i>Wolbachia</i> + host |
| Toomey et al., 2013       | ovaries            | <i>Wolbachia</i>        | NA                      |
| Toomey, Frydman, 2014     | testes             | <i>Wolbachia</i> + host | NA                      |
| this study                | CNS + ovaries      | host                    | <i>Wolbachia</i>        |

1165
